# Supplementary material for: Genetic association studies of alterations in protein function expose recessive effects on cancer predisposition
Source: PubMed Central journal article supplement (PMC8295298; doi:10.1038/s41598-021-94252-y), 2021-07-21

# Supplementary Figures

## Genetic association studies of alterations in protein function expose recessive effects on cancer predisposition

Nadav Brandes, Nathan Linial, Michal Linial

### **Contents:**

Supplementary Fig. S1: Genome-wide cancer predisposition in all ten cancer-types (an extension of Fig. 4 in the main text; page 2).

Supplementary Fig. S2: Cancer risk across all 110 PWAS-significant genes (an extension of Fig. 6C in the main text; page 6).

Supplementary Fig. S1: Genome-wide cancer predisposition in all ten cancer-types

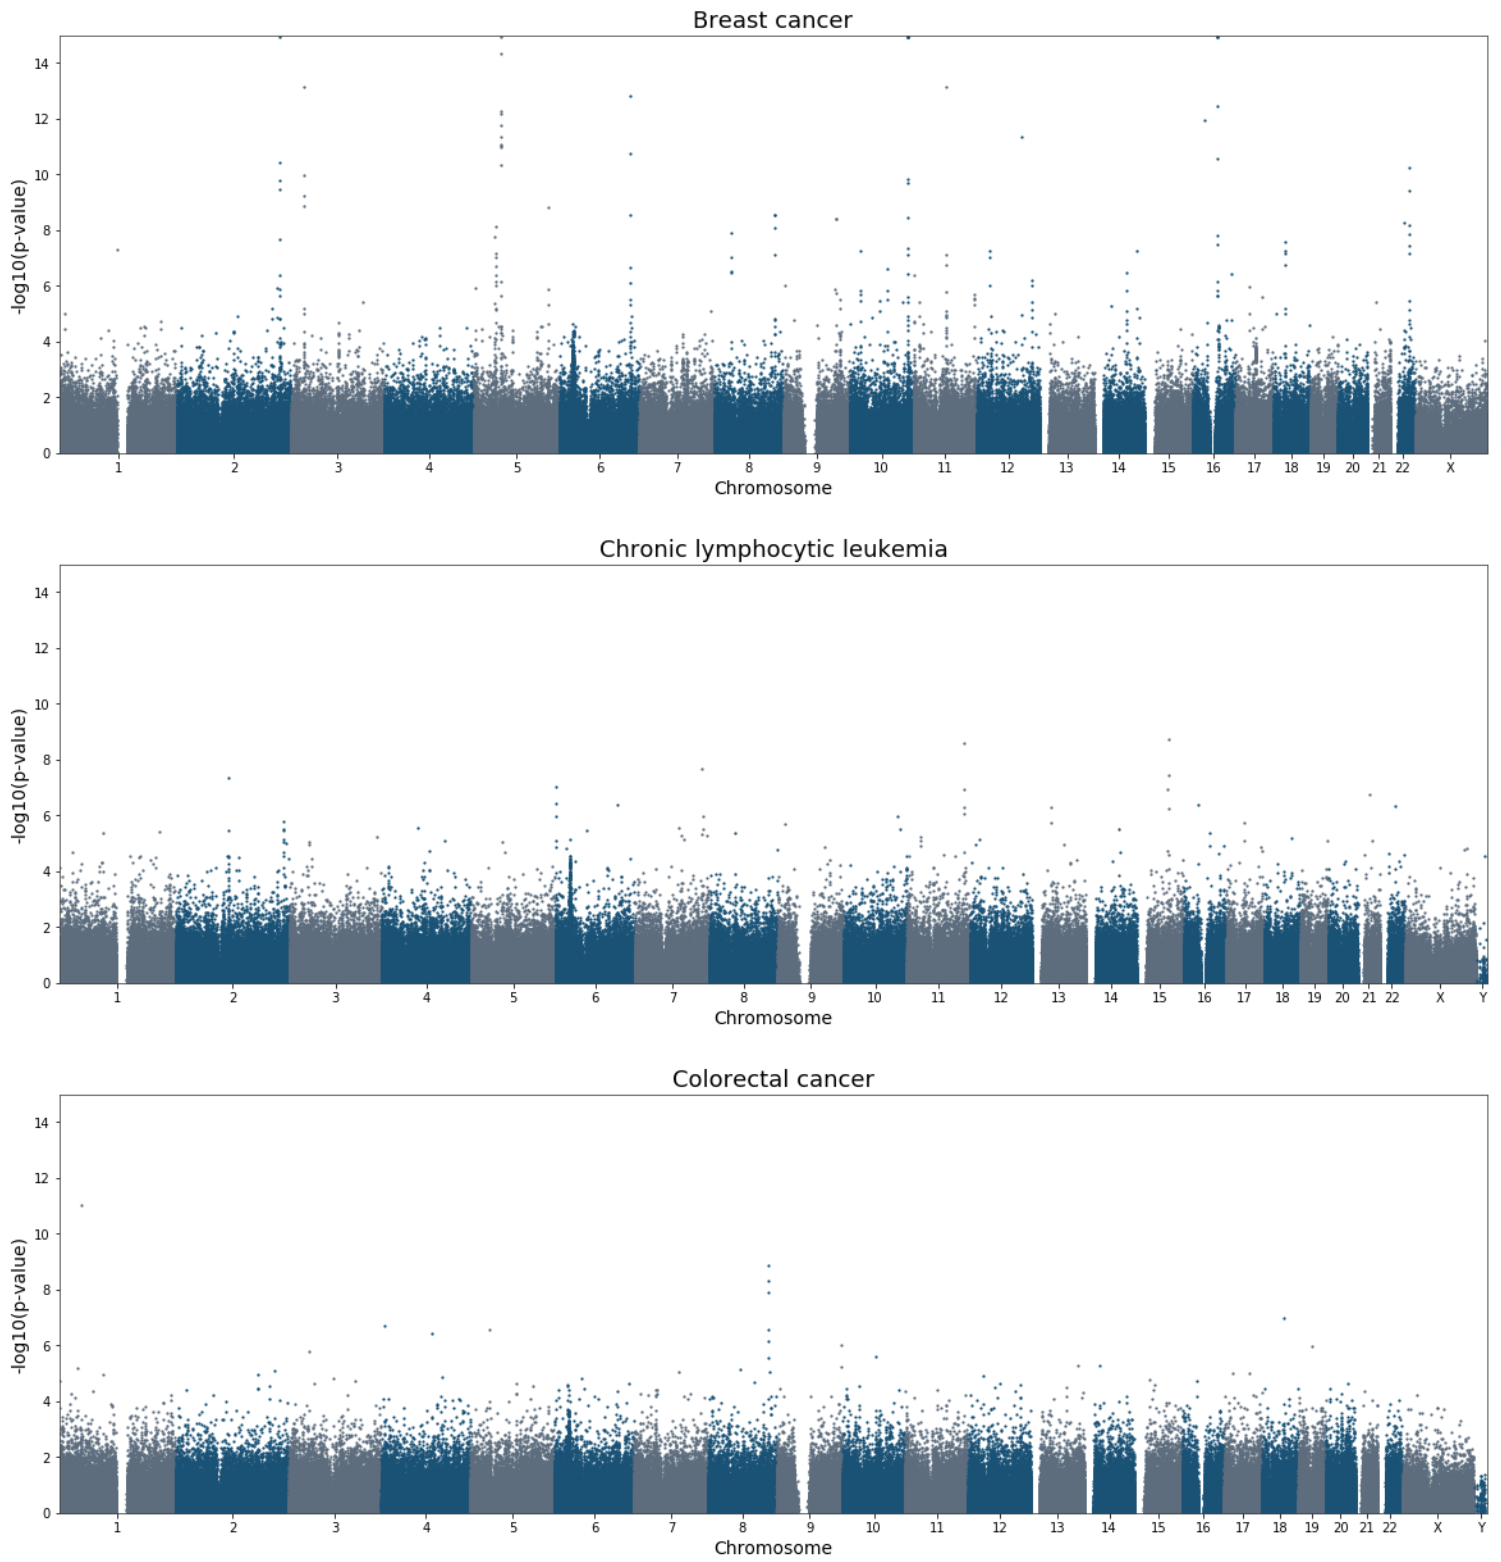

Epithelial ovarian cancer

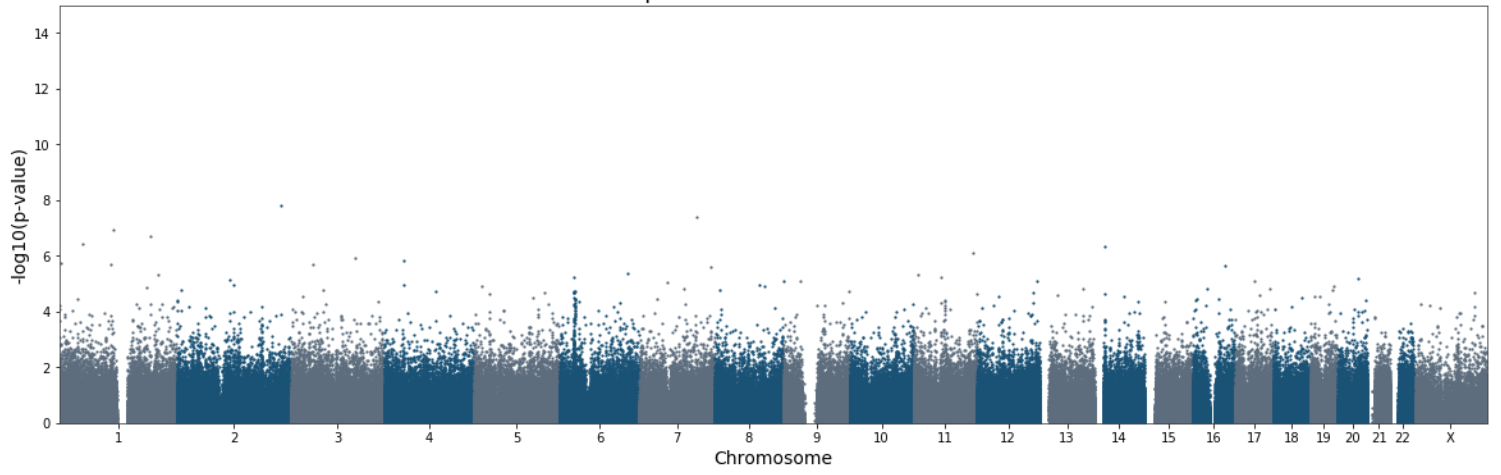

Lung cancer

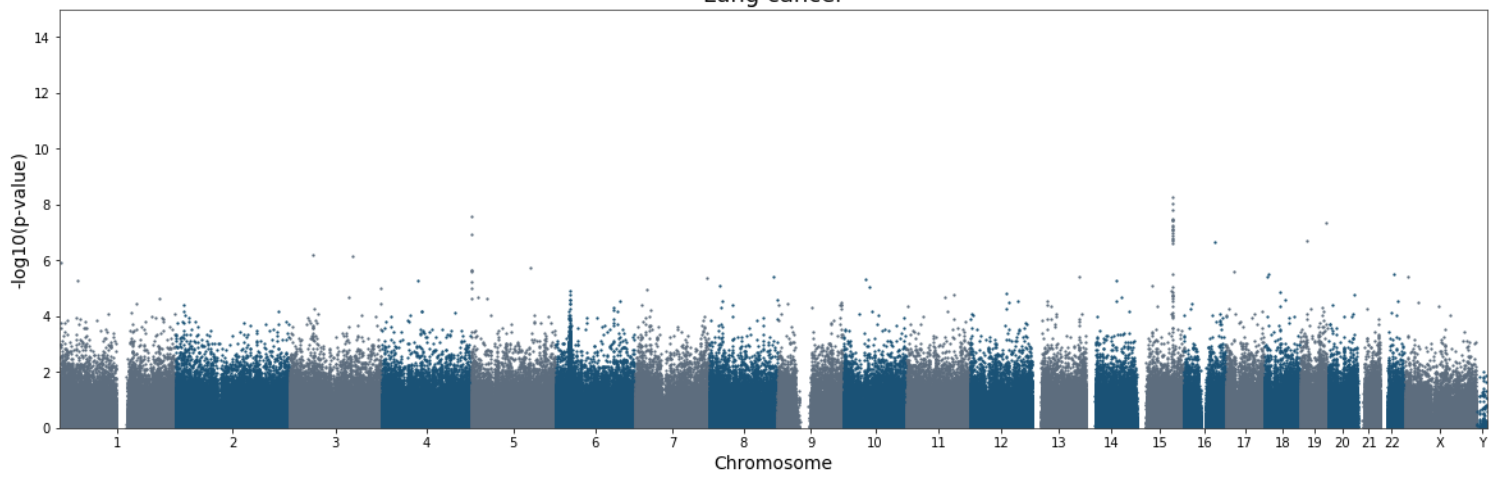

Melanoma

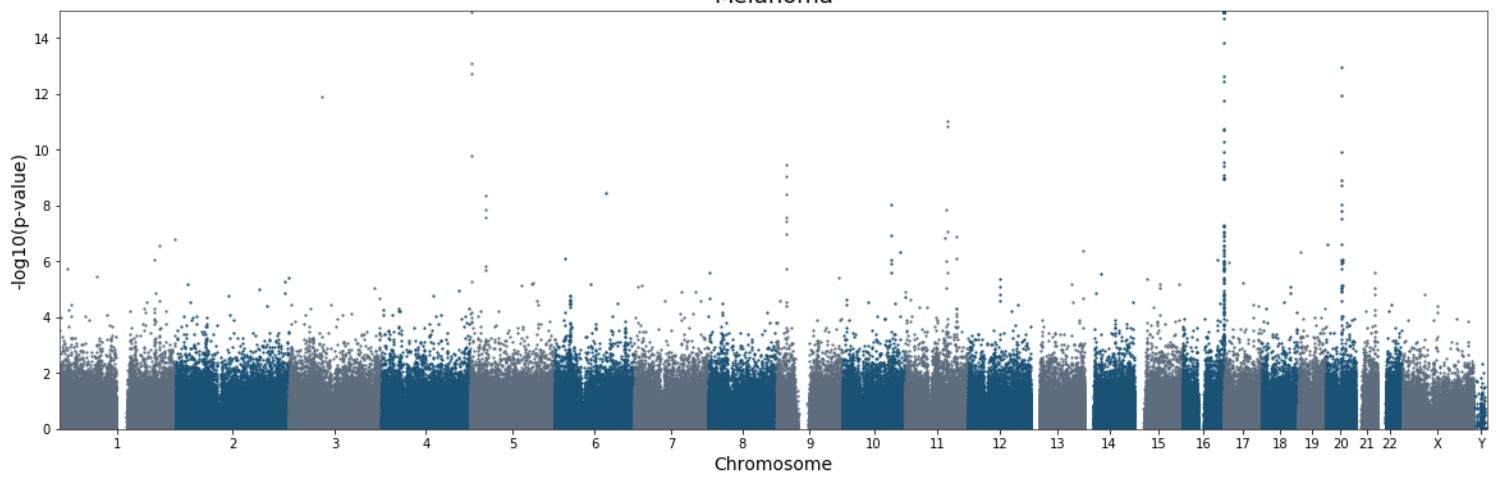

Non-melanoma skin cancer

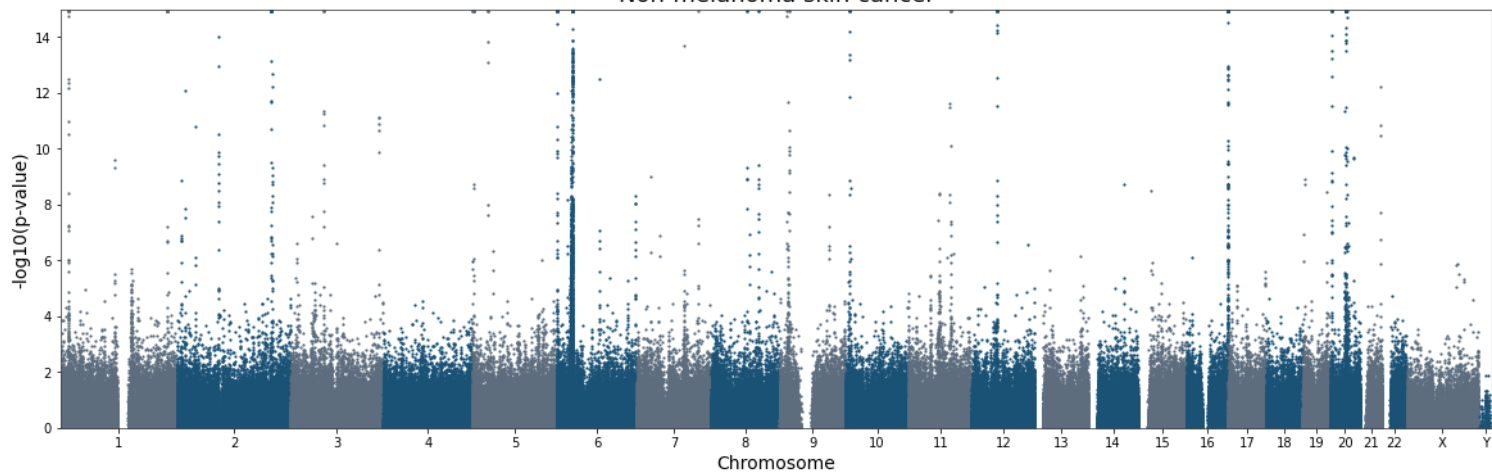

Pan-cancer

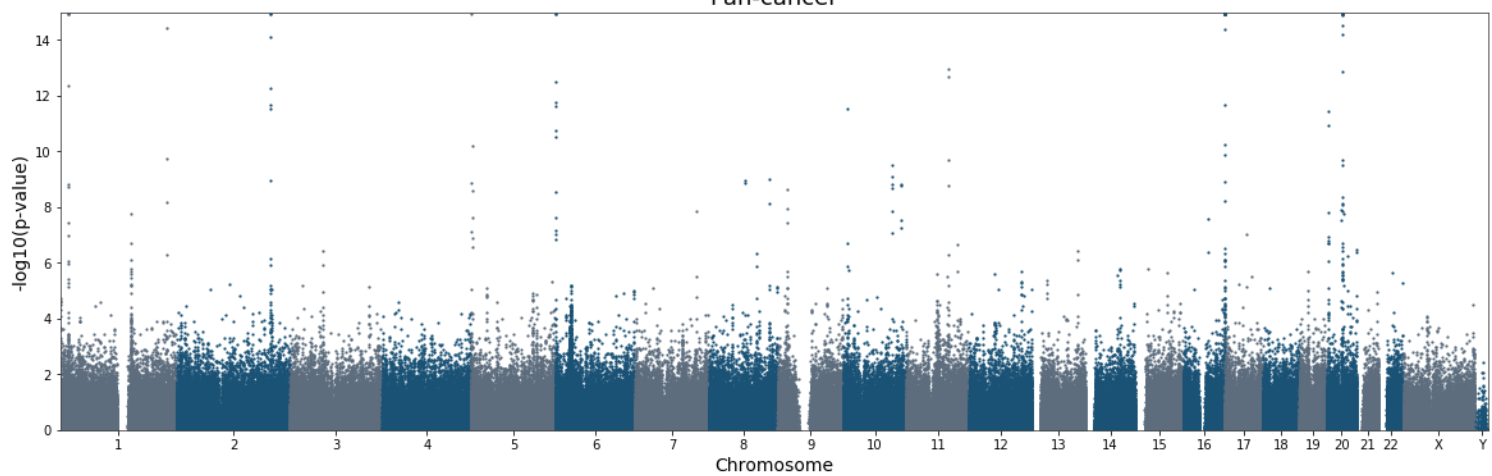

Pancreatic cancer

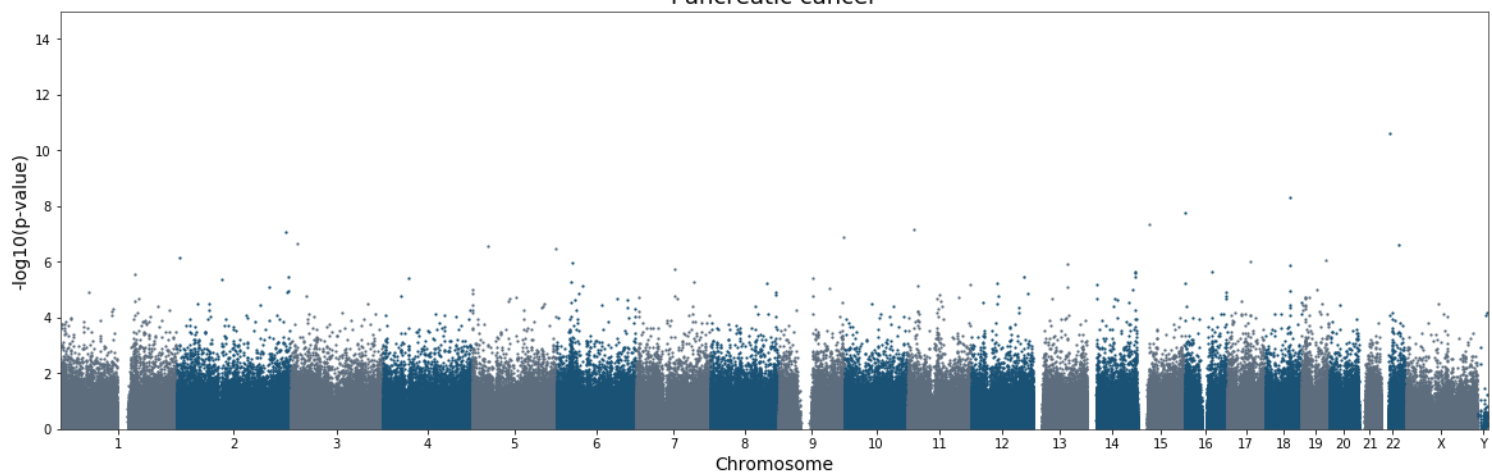

# Prostate cancer

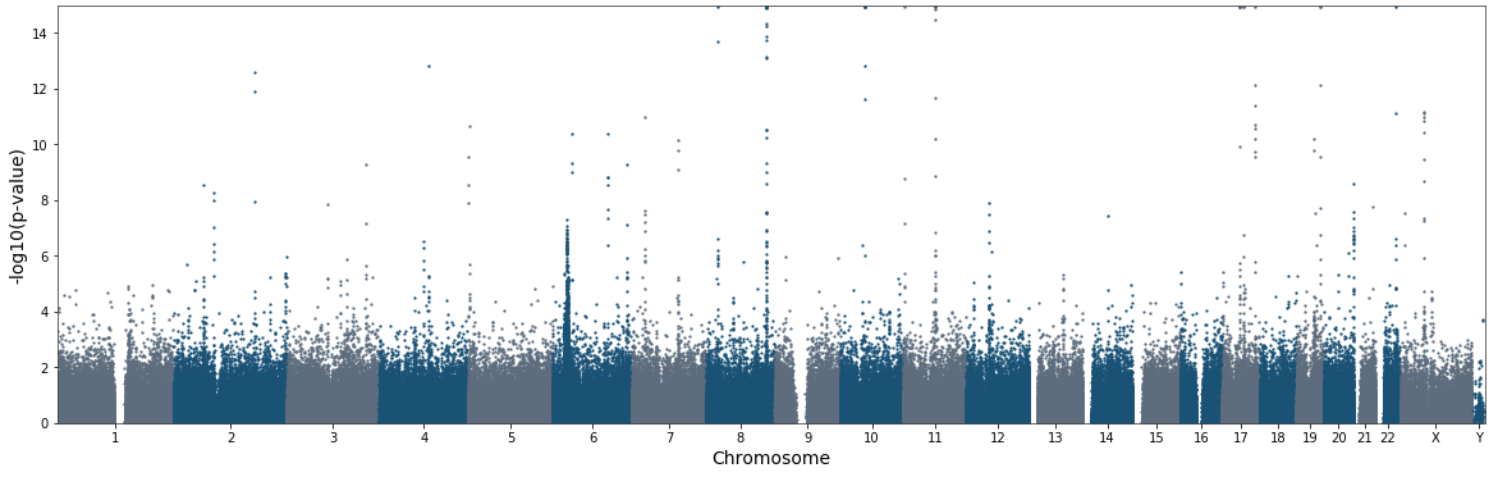

Supplementary Fig. S2: Cancer risk across all 110 PWAS-significant genes

CCDC170 & Breast cancer: PWAS q-value = 5e-05 (Dominant)

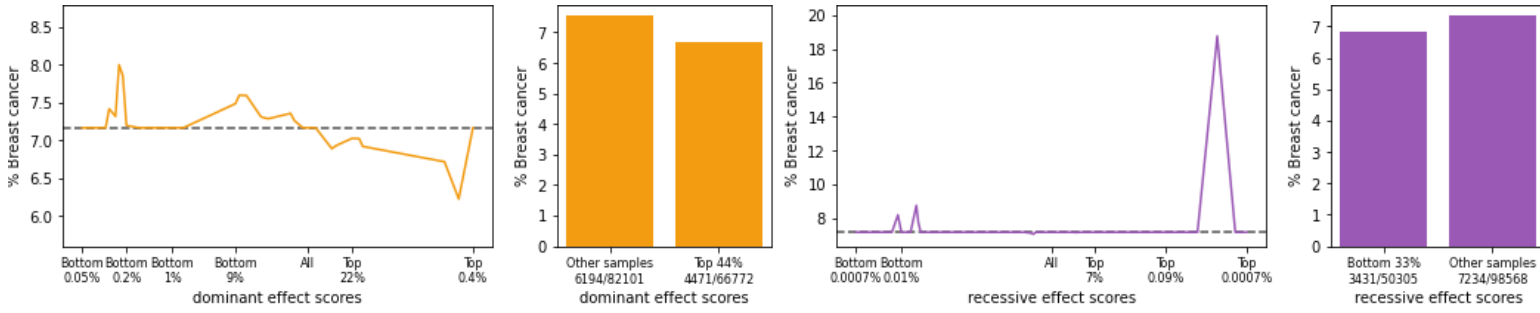

CHEK2 & Breast cancer: PWAS q-value = 5e-05 (Dominant)

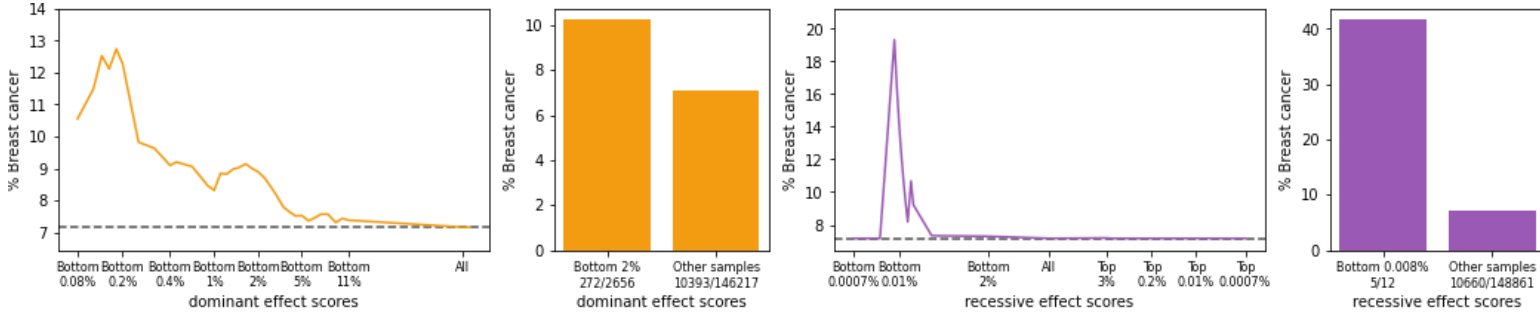

ALDOA & Chronic lymphocytic leukemia: PWAS q-value = 0.007 (Dominant)

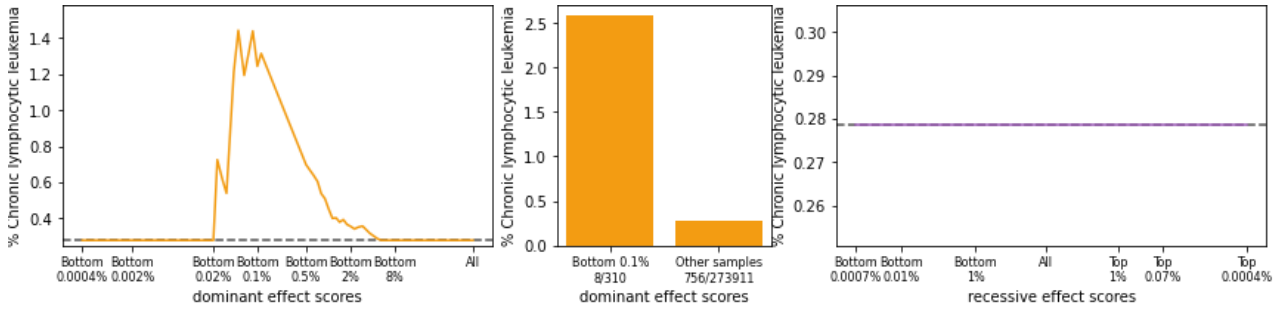

BIRC3 & Chronic lymphocytic leukemia: PWAS q-value = 0.04 (Recessive)

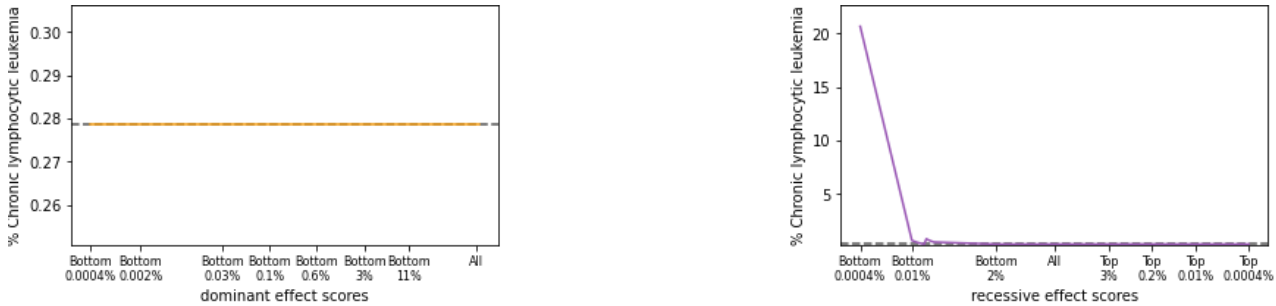

CCT8 & Chronic lymphocytic leukemia: PWAS q-value = 0.02 (Recessive)

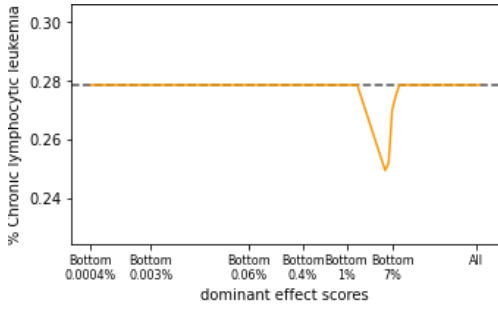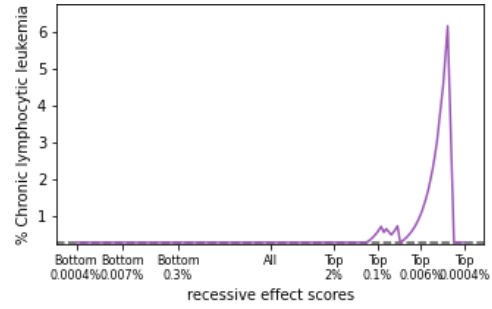

CTNNAL1 & Chronic lymphocytic leukemia: PWAS q-value = 0.05 (Dominant)

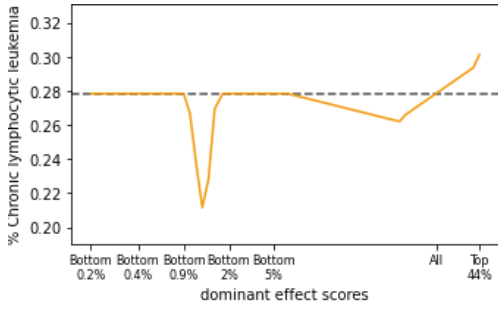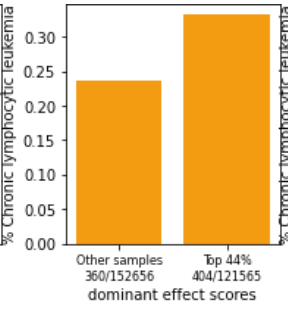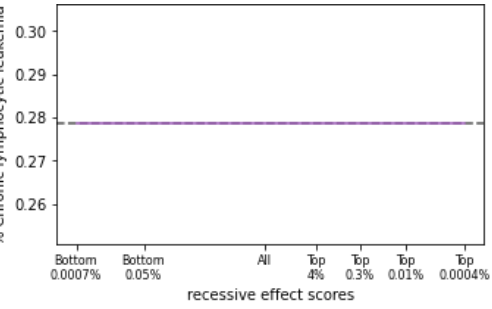

DPT & Chronic lymphocytic leukemia: PWAS q-value = 0.04 (Recessive)

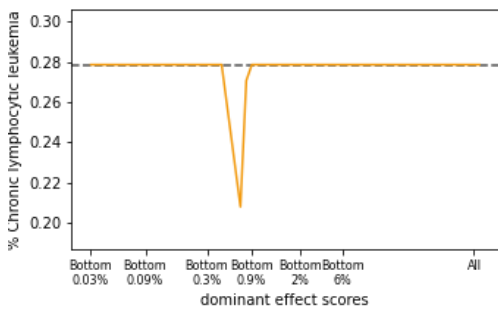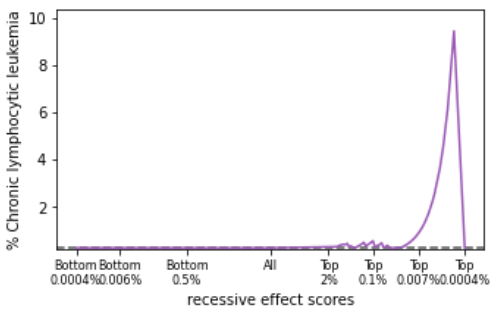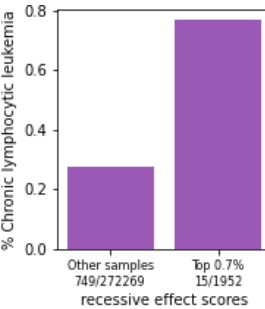

FAM160B1 & Chronic lymphocytic leukemia: PWAS q-value = 0.009 (None)

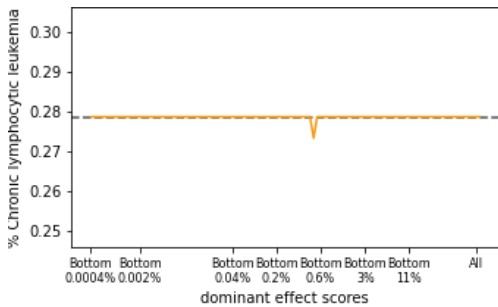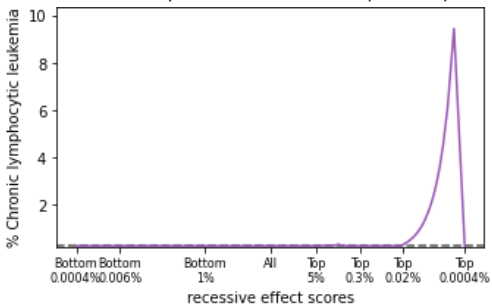

FCGR1A & Chronic lymphocytic leukemia: PWAS q-value = 0.04 (Recessive)

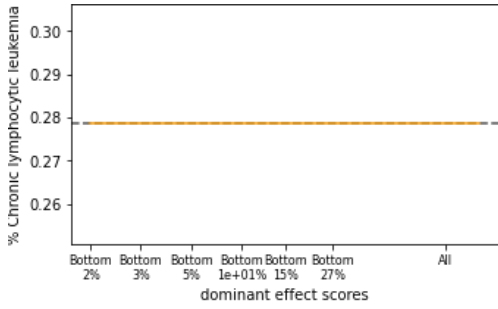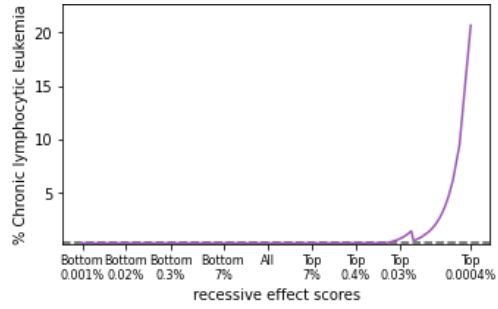

LYZL4 & Chronic lymphocytic leukemia: PWAS q-value = 0.02 (Recessive)

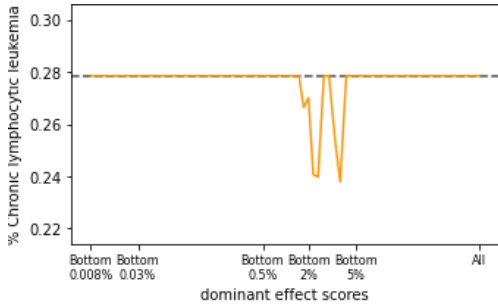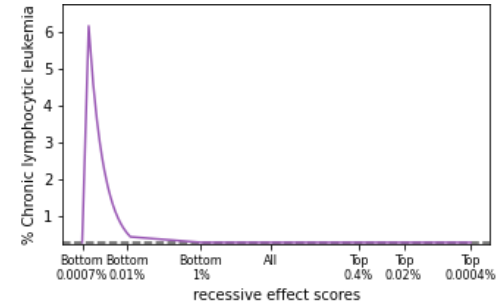

NLRP9 & Chronic lymphocytic leukemia: PWAS q-value = 0.02 (Recessive)

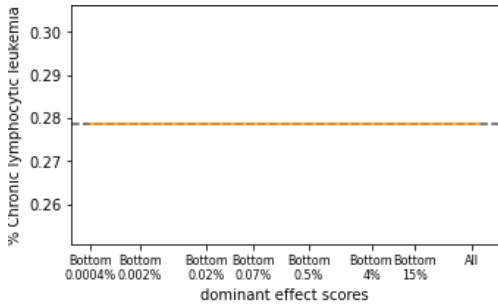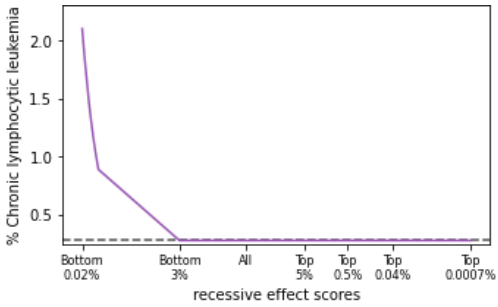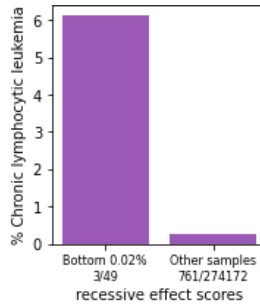

PCDH10 & Chronic lymphocytic leukemia: PWAS q-value = 0.02 (Recessive)

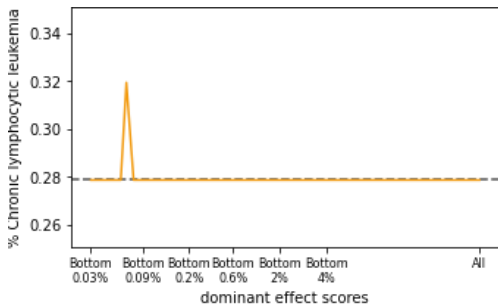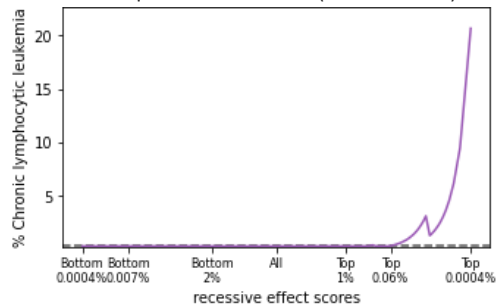



RBMX2 & Chronic lymphocytic leukemia: PWAS q-value = 0.03 (Recessive)

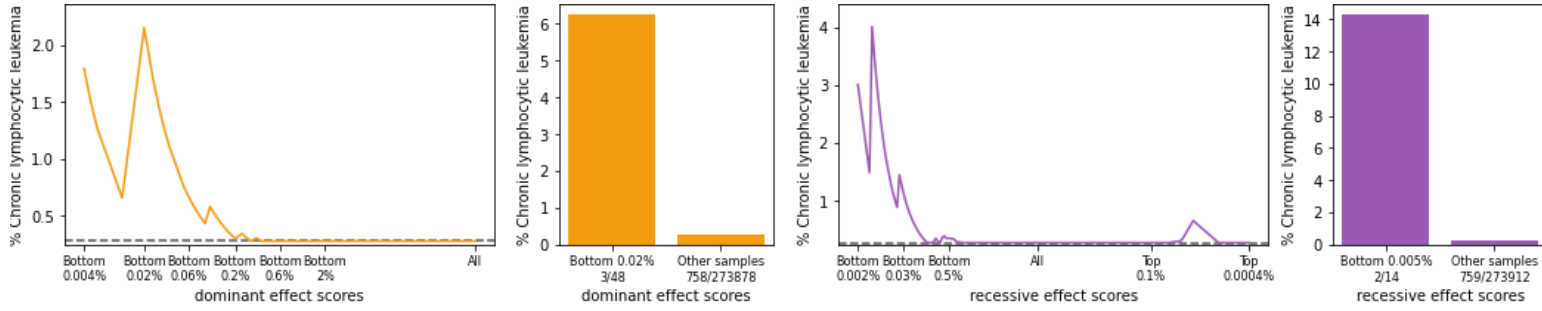

RCHY1 & Chronic lymphocytic leukemia: PWAS q-value = 0.01 (Recessive)

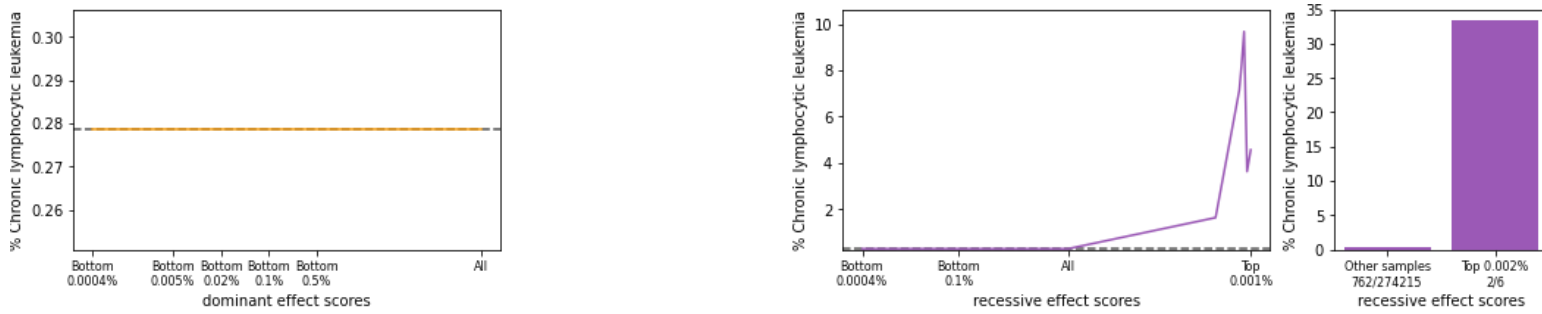

SGSM3 & Chronic lymphocytic leukemia: PWAS q-value = 0.05 (Recessive)

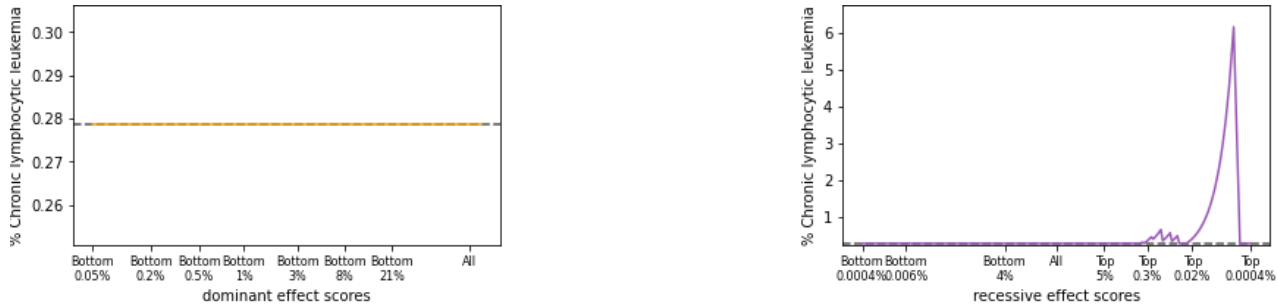

SRSF5 & Chronic lymphocytic leukemia: PWAS q-value = 0.01 (Dominant)

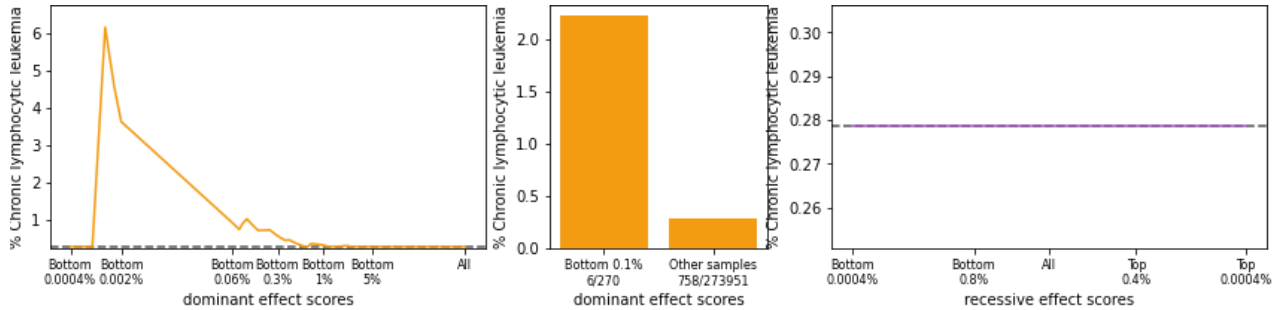

TNFSF18 & Chronic lymphocytic leukemia: PWAS q-value = 0.04 (Recessive)

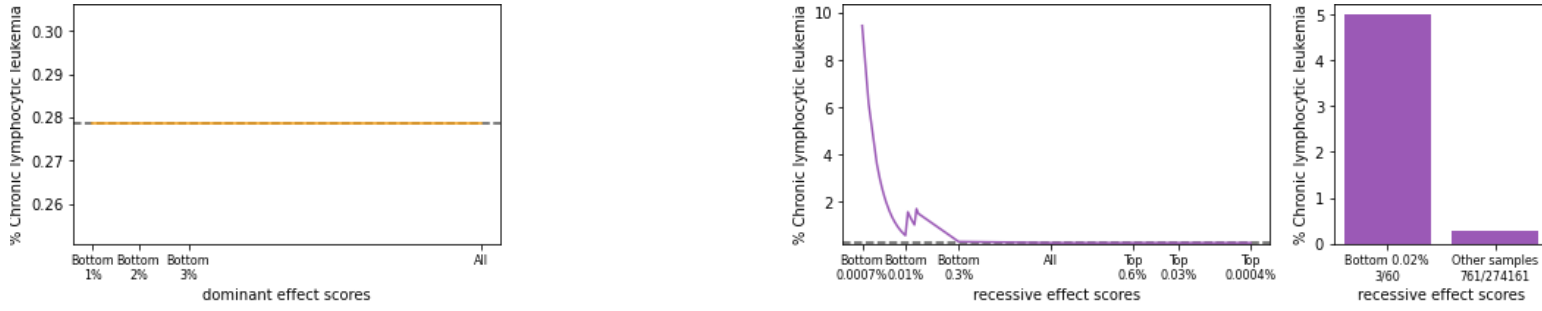

ZNF449 & Chronic lymphocytic leukemia: PWAS q-value = 0.03 (Recessive)

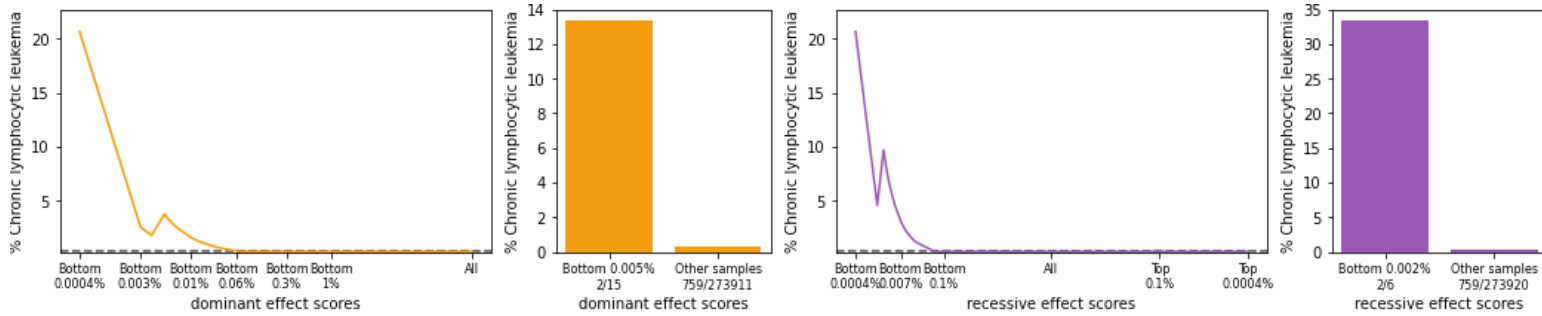

FHL3 & Colorectal cancer: PWAS q-value = 0.03 (None)

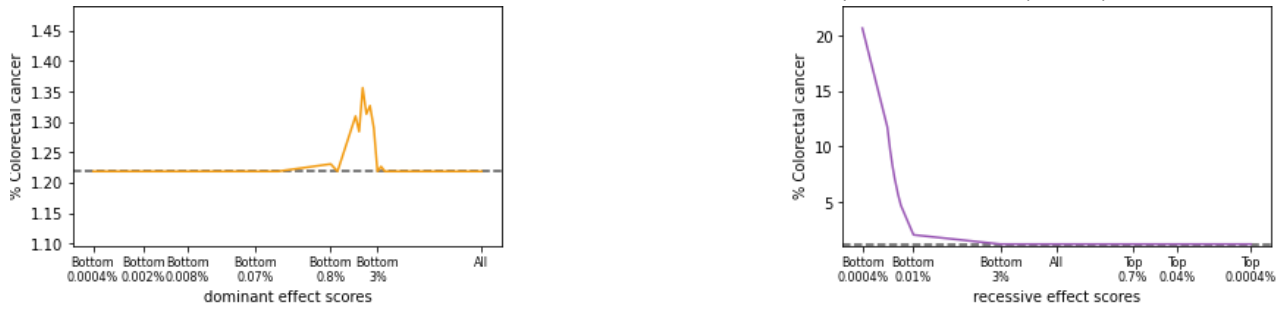

MUTYH & Colorectal cancer: PWAS q-value = 2e-07 (Recessive)

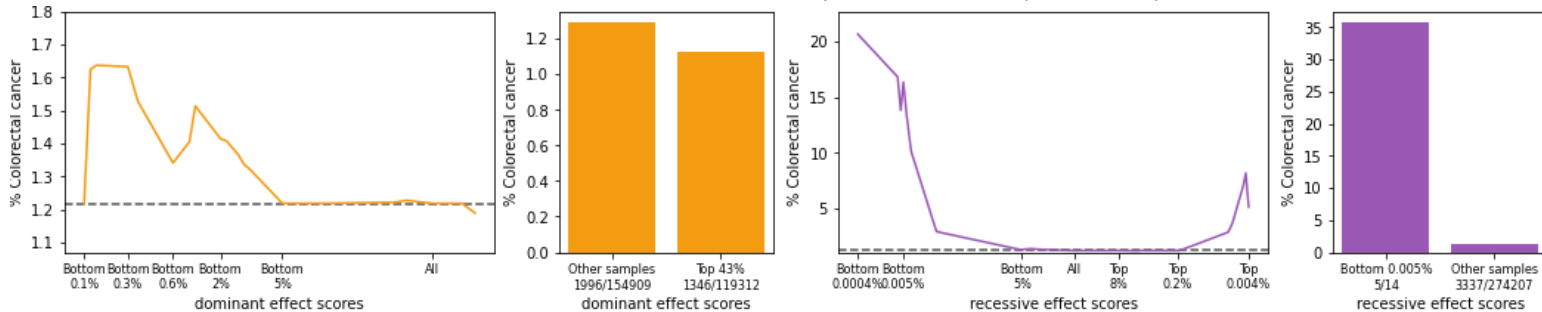

OSTC & Colorectal cancer: PWAS q-value = 0.003 (None)

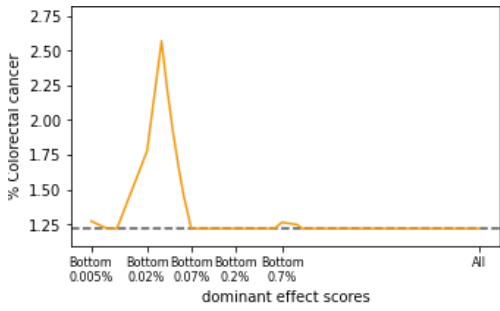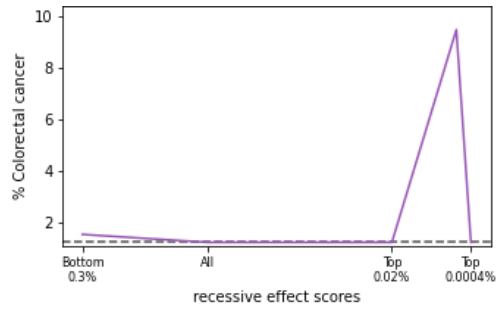

POU5F1B & Colorectal cancer: PWAS q-value = 0.004 (Dominant)

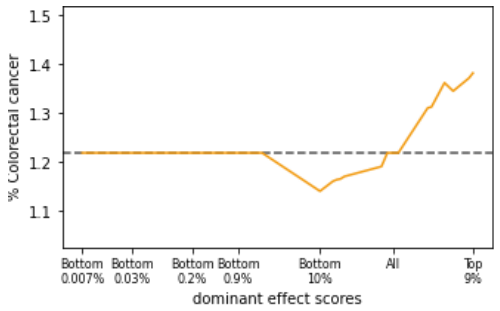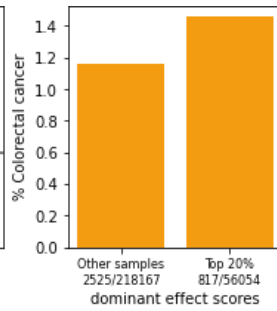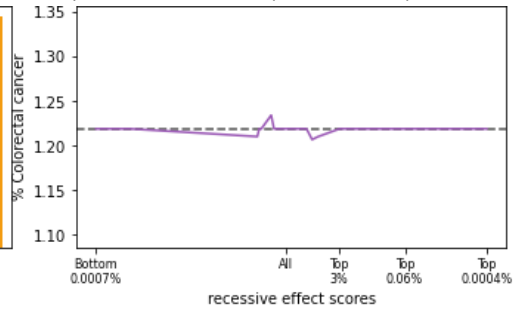

AKIRIN1 & Lung cancer: PWAS q-value = 0.03 (Recessive)

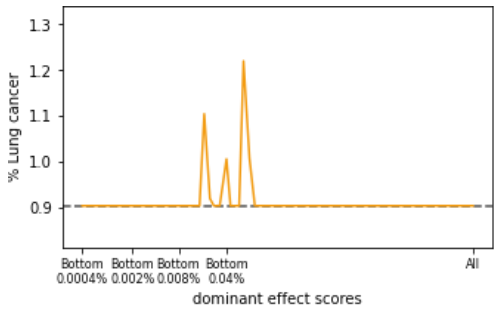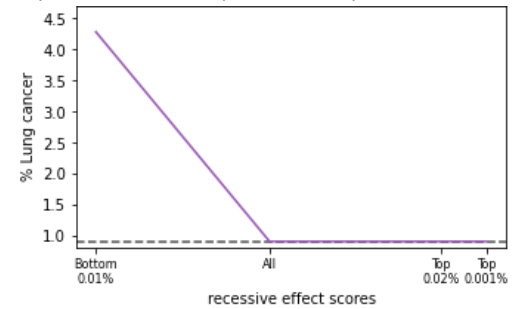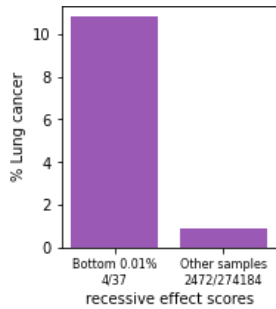

ATPAF2 & Lung cancer: PWAS q-value = 0.02 (Recessive)

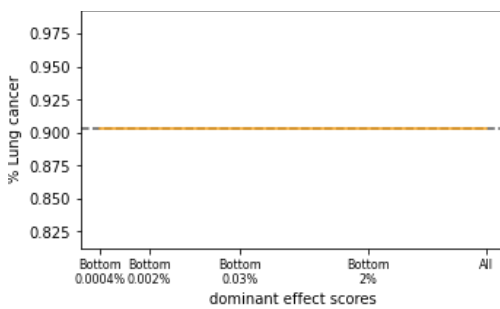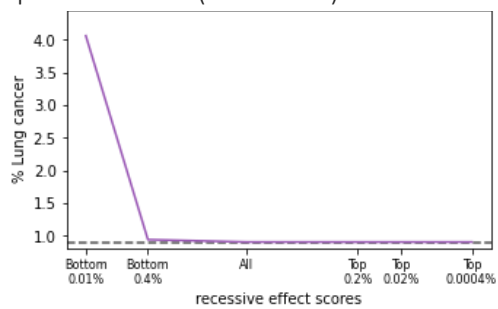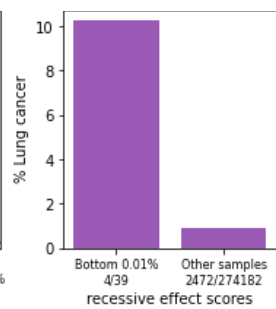

CHRNA5 & Lung cancer: PWAS q-value = 0.003 (Dominant)

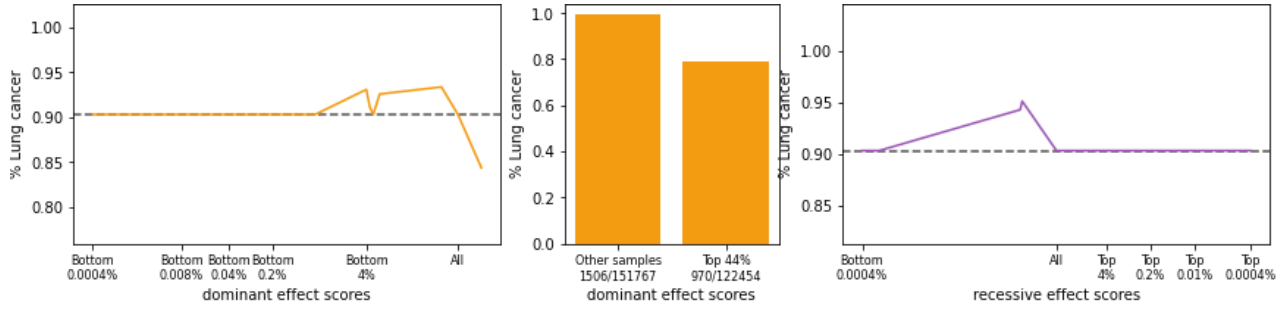

SLC12A6 & Lung cancer: PWAS q-value = 0.04 (Recessive)

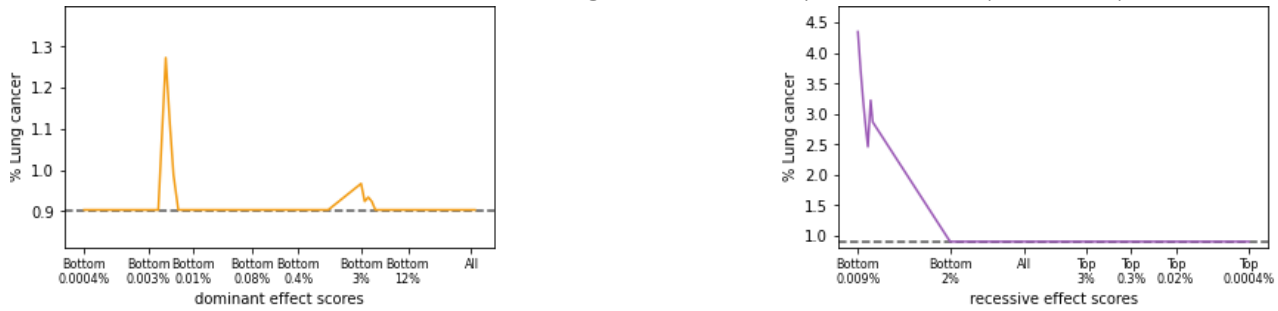

AVP & Melanoma: PWAS q-value = 0.0009 (Recessive)

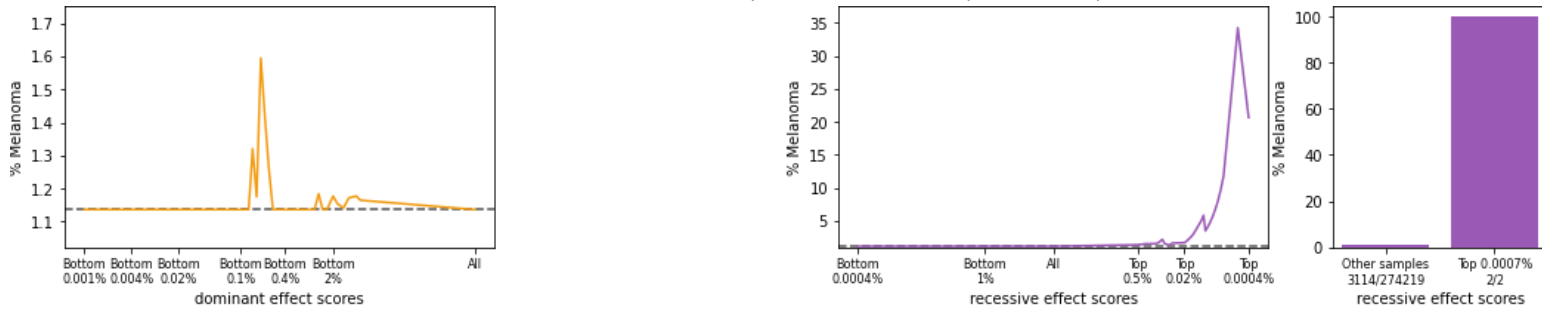

MC1R & Melanoma: PWAS q-value = 2e-53 (Dominant & recessive)

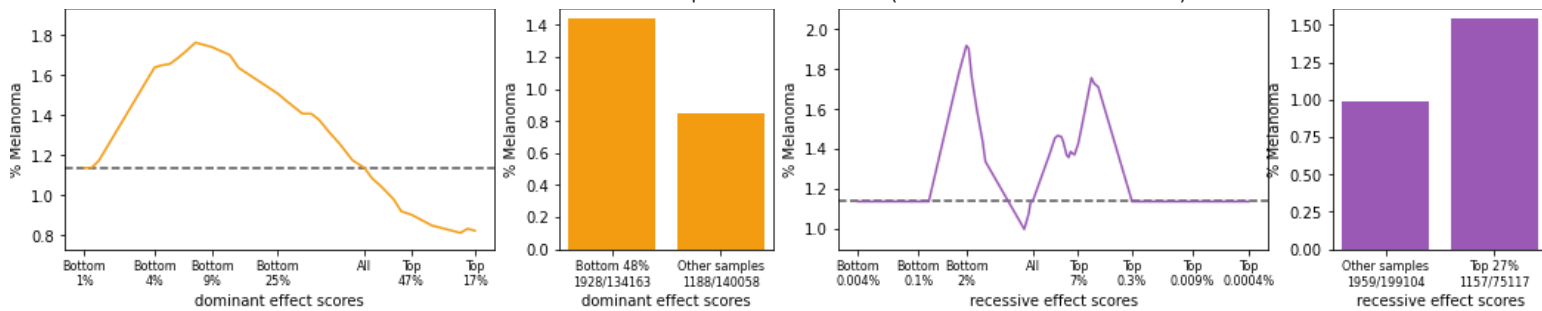

MITF & Melanoma: PWAS q-value = 1e-08 (Dominant & recessive)

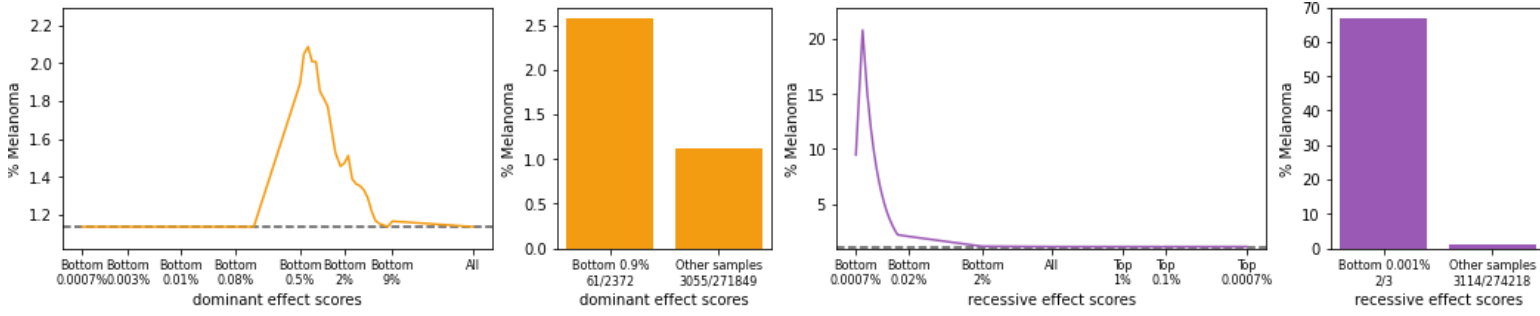

MTAP & Melanoma: PWAS q-value = 0.0001 (Dominant & recessive)

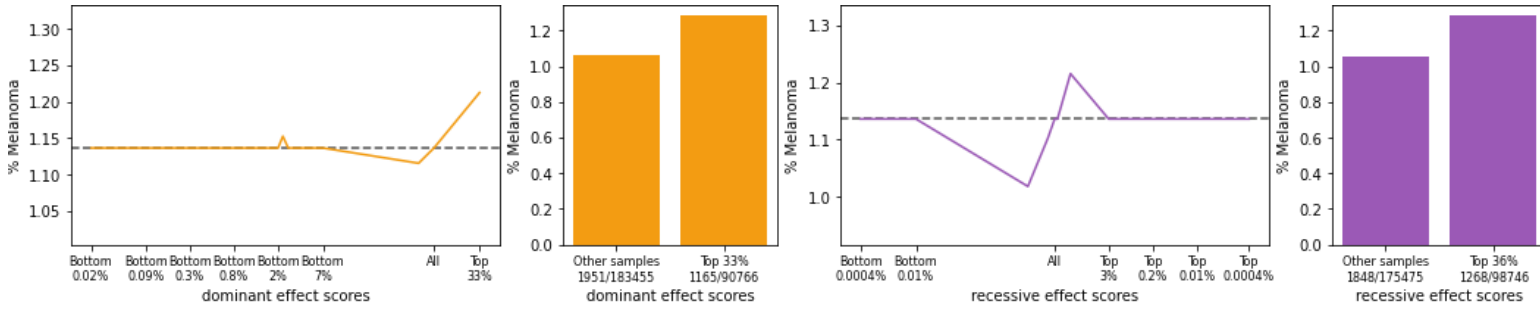

NCOA6 & Melanoma: PWAS q-value = 0.01 (Recessive)

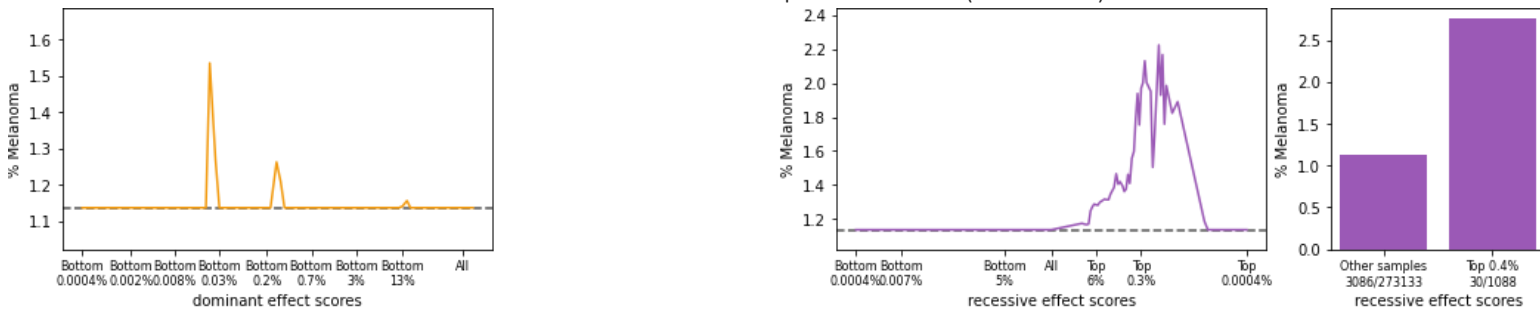

PADI1 & Melanoma: PWAS q-value = 0.004 (Recessive)

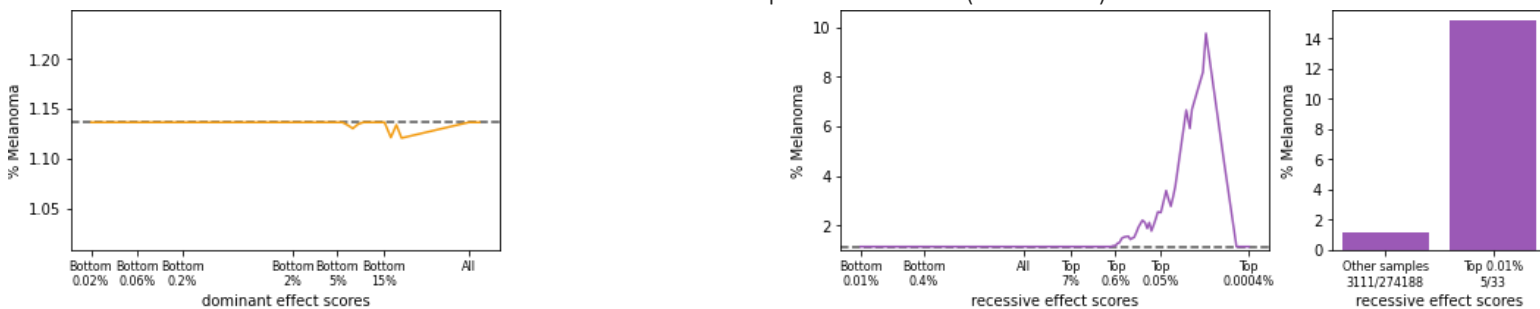

POLR2H & Melanoma: PWAS q-value = 0.01 (Recessive)

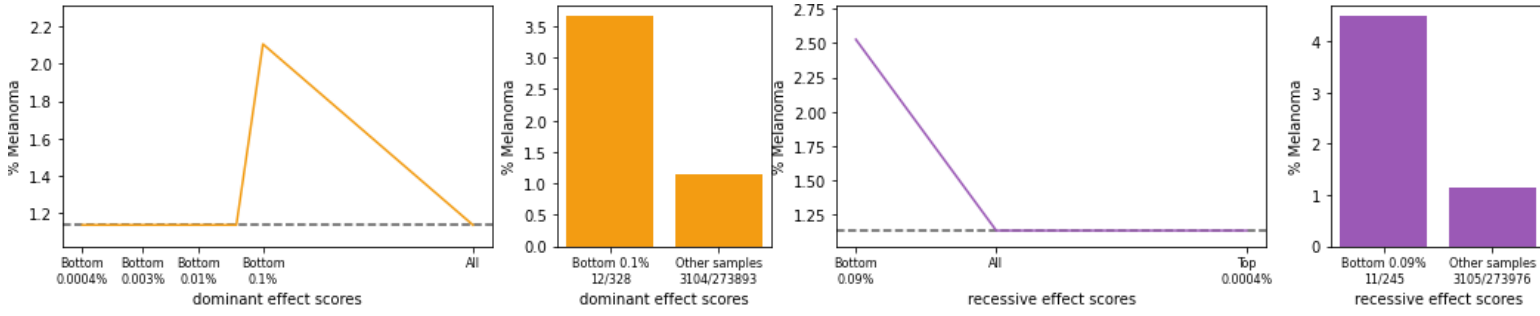

SLC12A9 & Melanoma: PWAS q-value = 0.02 (Recessive)

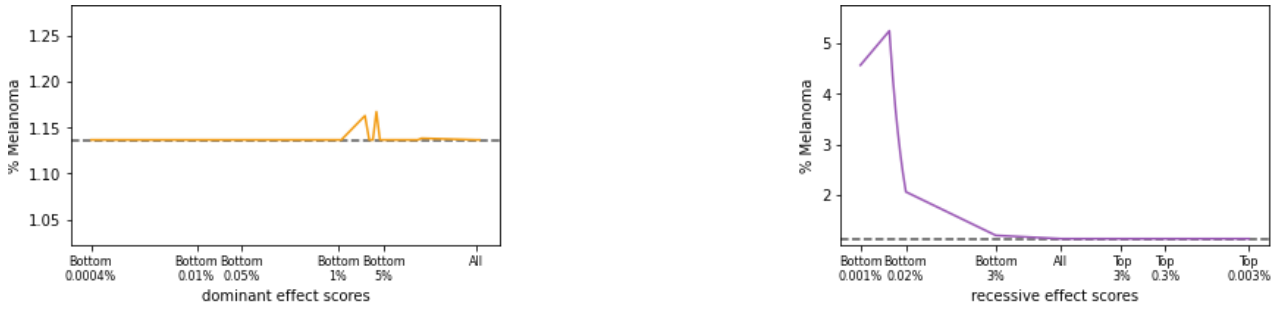

SLC45A2 & Melanoma: PWAS q-value = 8e-05 (Recessive)

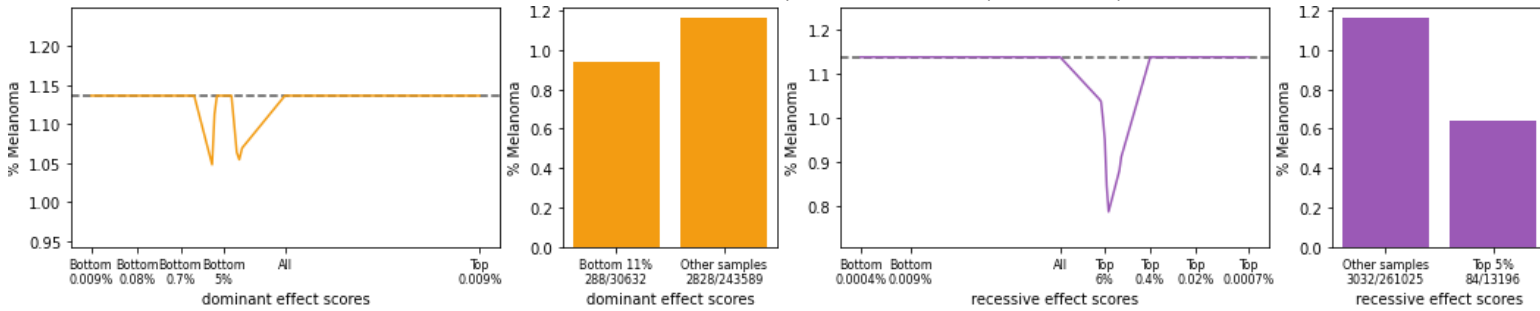

STN1 & Melanoma: PWAS q-value = 0.005 (Recessive)

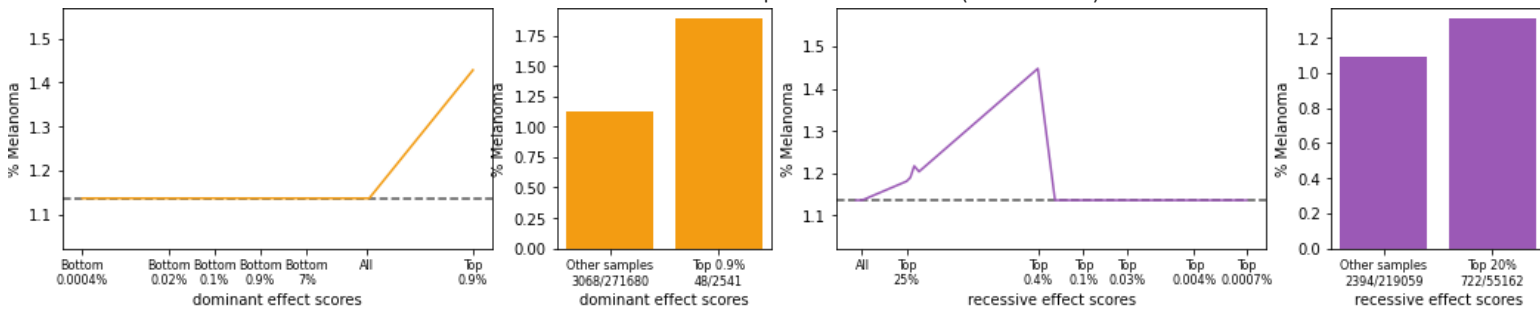

STX8 & Melanoma: PWAS q-value = 0.003 (Recessive)

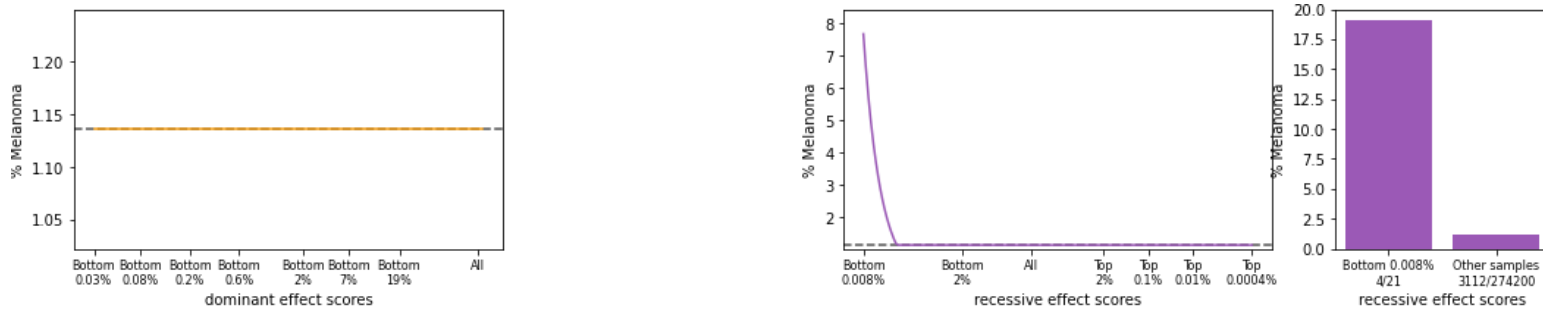

TYR & Melanoma: PWAS q-value = 0.005 (Recessive)

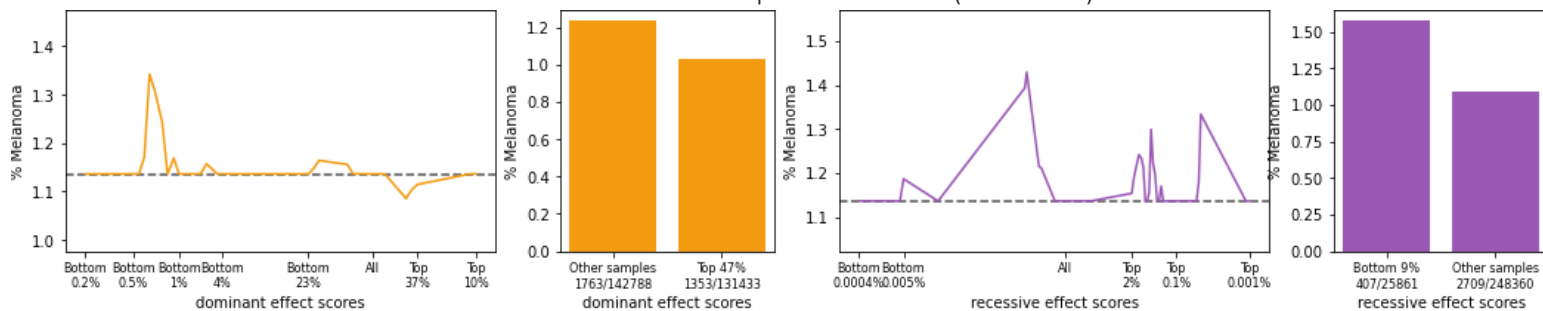

ZNF276 & Melanoma: PWAS q-value = 0.02 (Recessive)

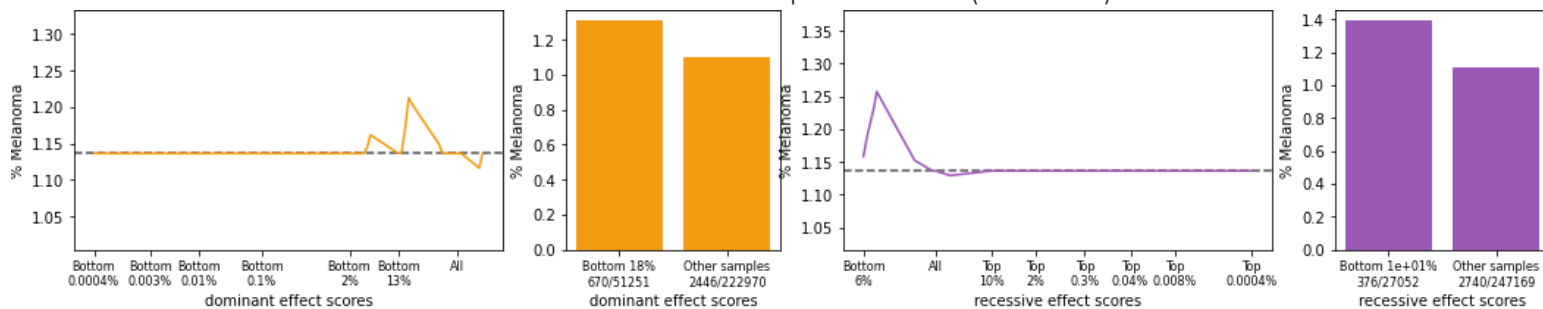

ACTL10 & Non-melanoma skin cancer: PWAS q-value = 0.003 (Dominant)

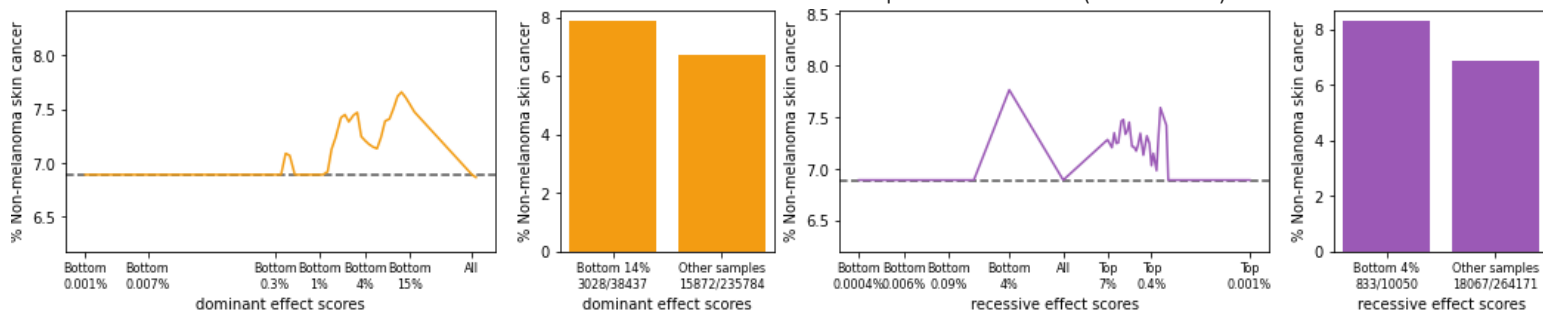

ALS2CR12 & Non-melanoma skin cancer: PWAS q-value = 1e-34 (Dominant & recessive)

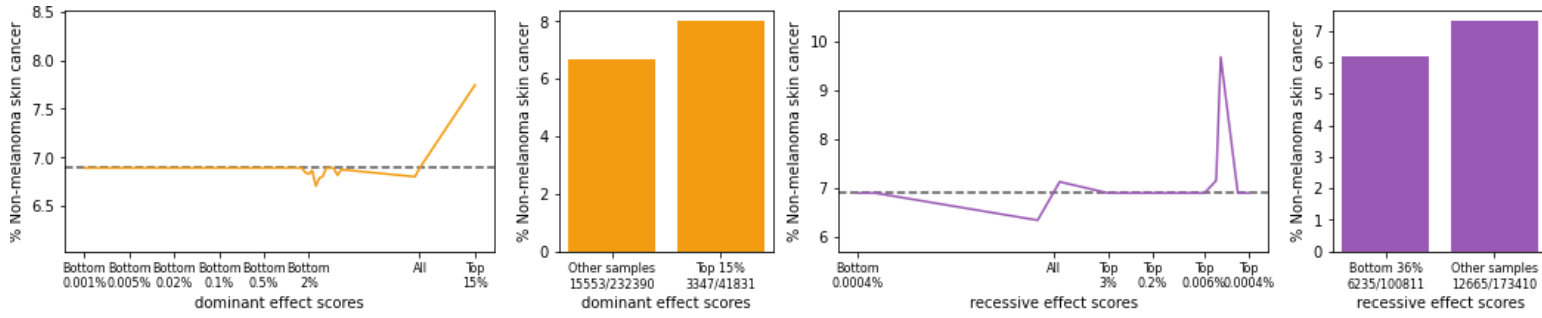

ANKLE1 & Non-melanoma skin cancer: PWAS q-value = 0.05 (Dominant)

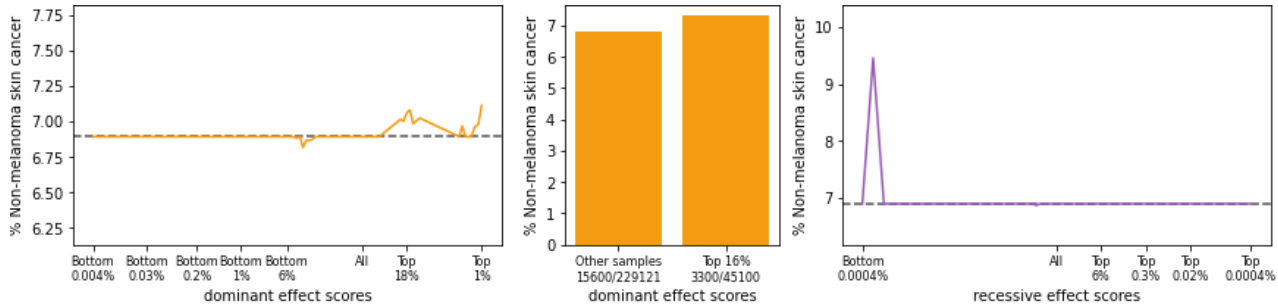

BCAS4 & Non-melanoma skin cancer: PWAS q-value = 0.04 (Dominant)

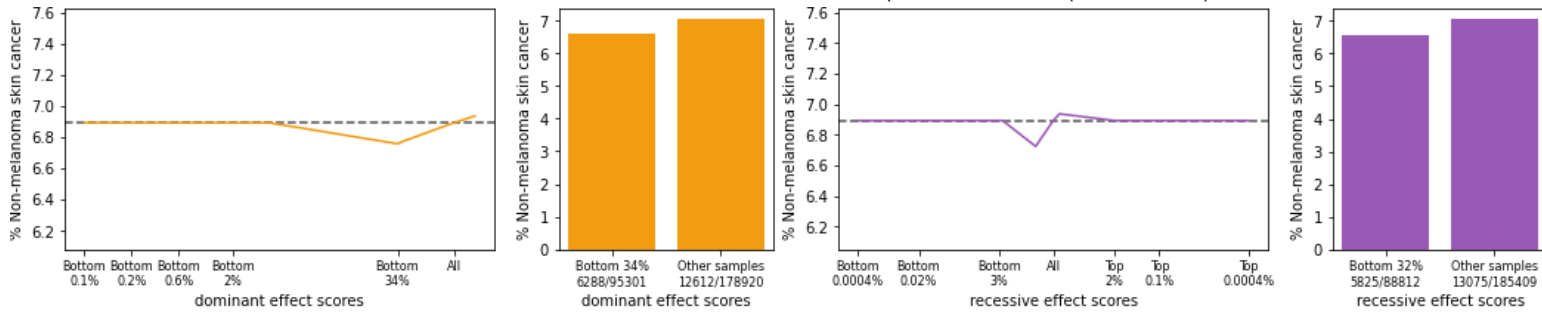

BNIPL & Non-melanoma skin cancer: PWAS q-value = 0.006 (Dominant)

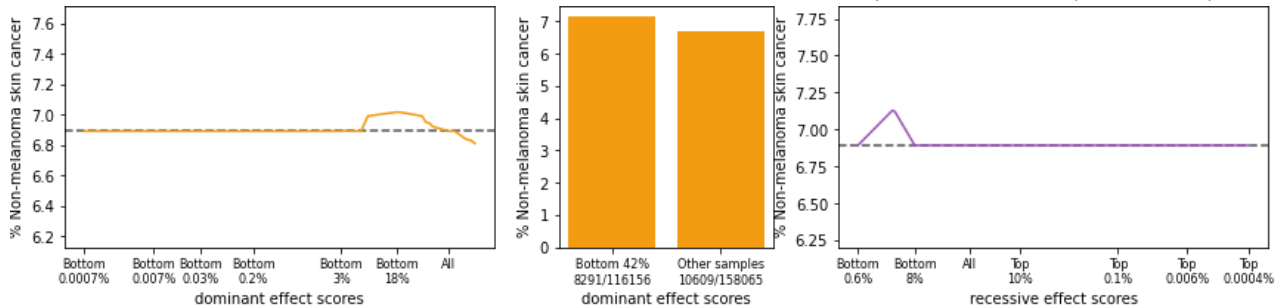



BPIFB3 & Non-melanoma skin cancer: PWAS q-value = 0.008 (Dominant)

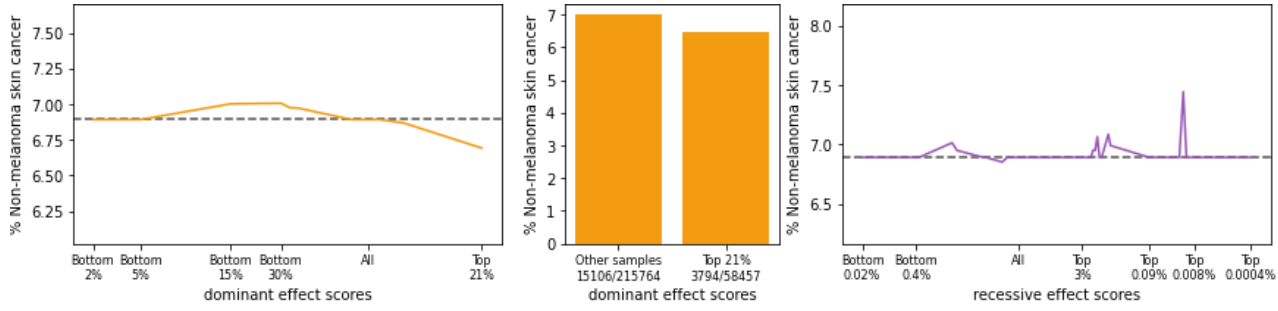

C6orf15 & Non-melanoma skin cancer: PWAS q-value = 0.03 (None)

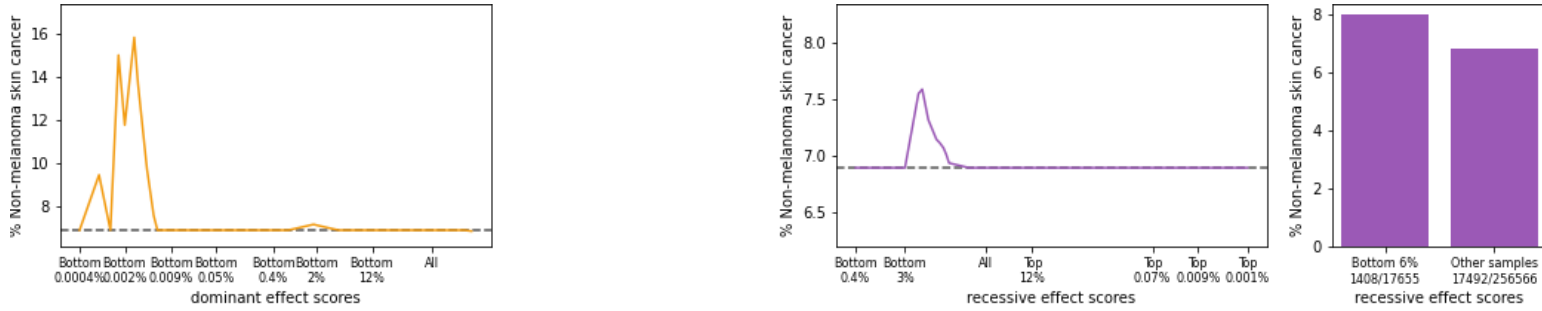

CCDC88B & Non-melanoma skin cancer: PWAS q-value = 0.02 (None)

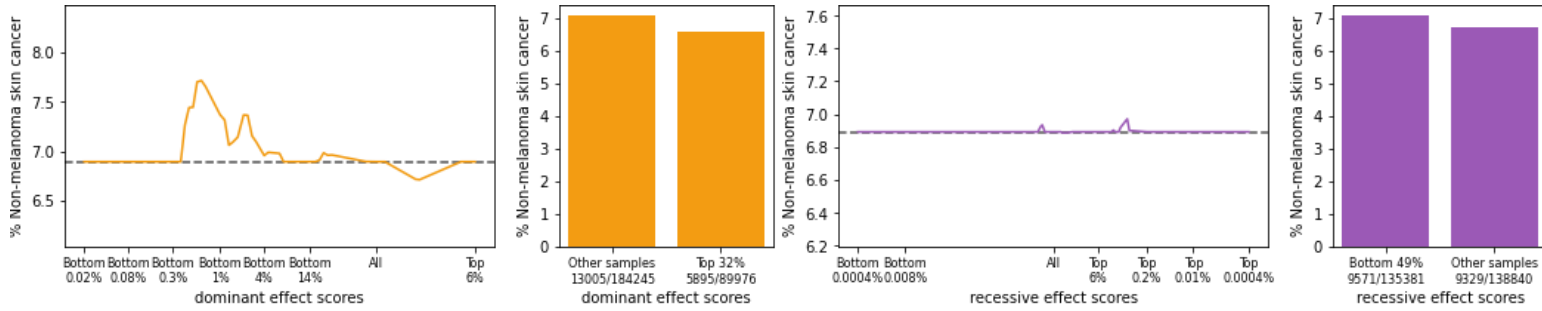

CCHCR1 & Non-melanoma skin cancer: PWAS q-value = 0.001 (Recessive)

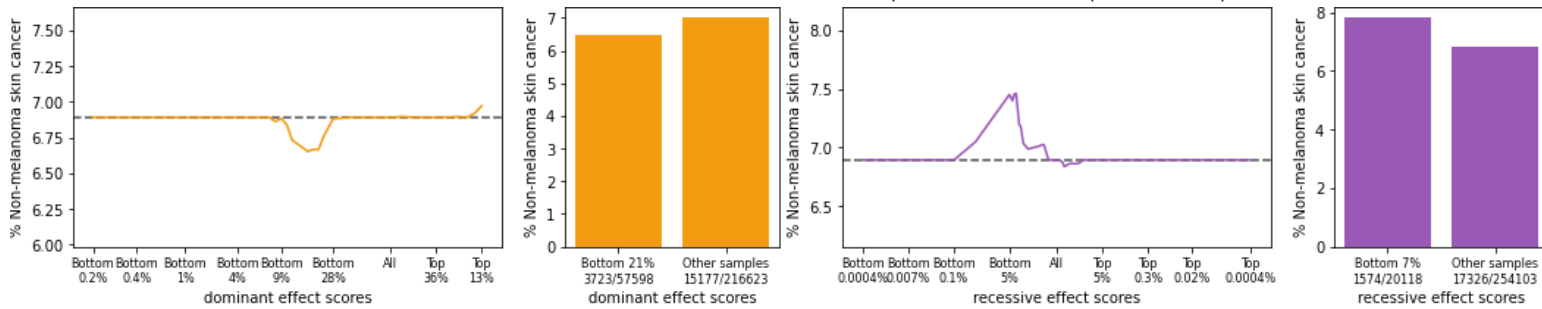

CTLA4 & Non-melanoma skin cancer: PWAS q-value = 4e-06 (Dominant & recessive)

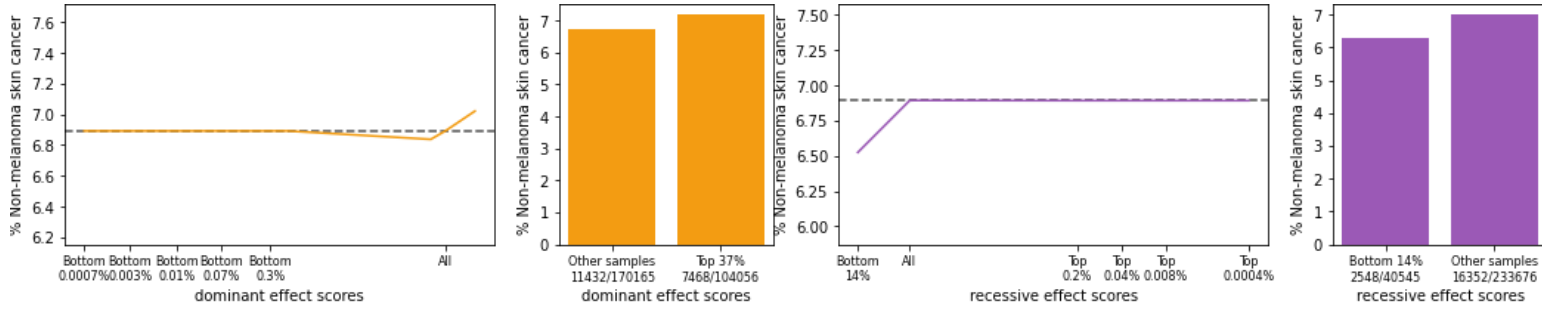

FAM153C & Non-melanoma skin cancer: PWAS q-value = 0.02 (None)

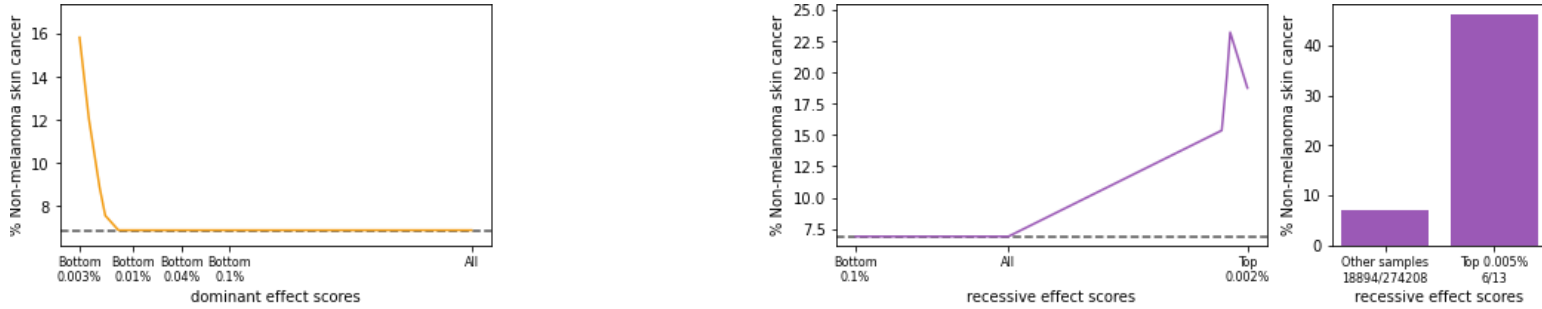

HLA-C & Non-melanoma skin cancer: PWAS q-value = 0.0002 (Dominant)

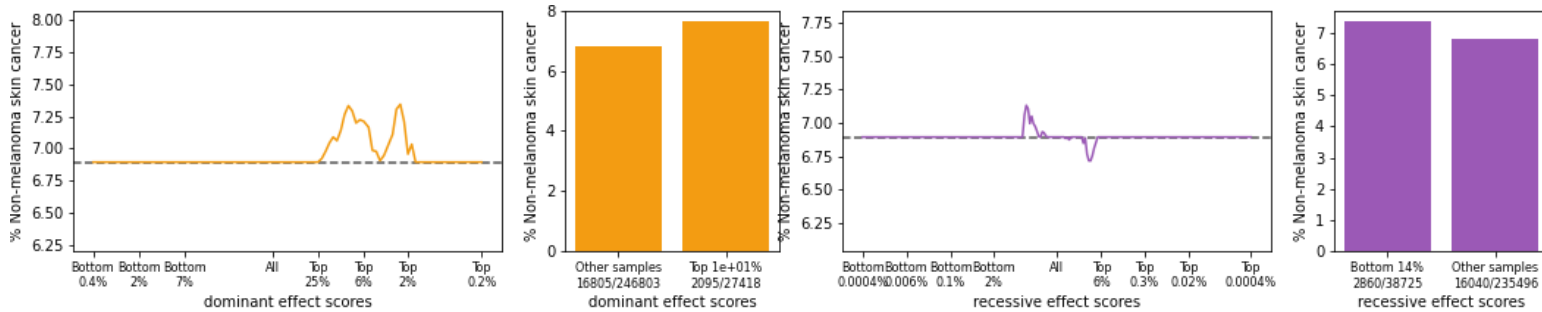

HLA-DPA1 & Non-melanoma skin cancer: PWAS q-value = 6e-05 (Dominant & recessive)

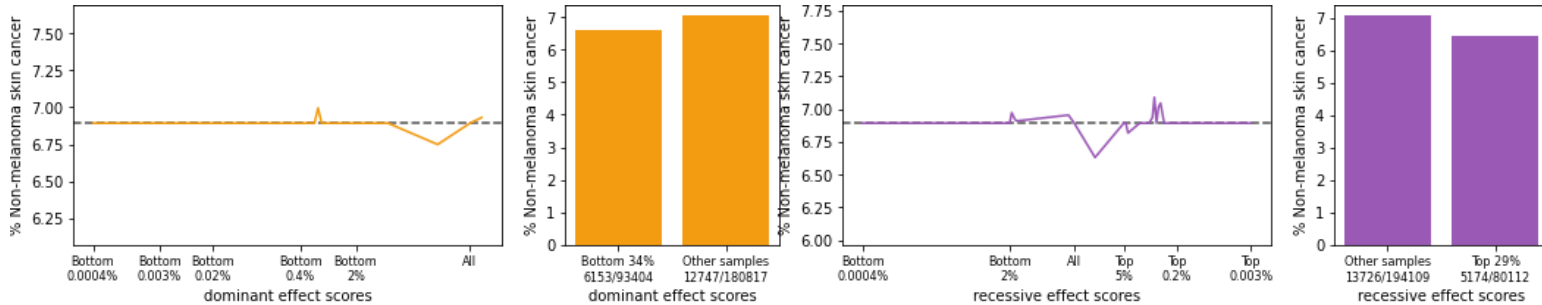

IGKV1-16 & Non-melanoma skin cancer: PWAS q-value = 0.04 (Dominant)

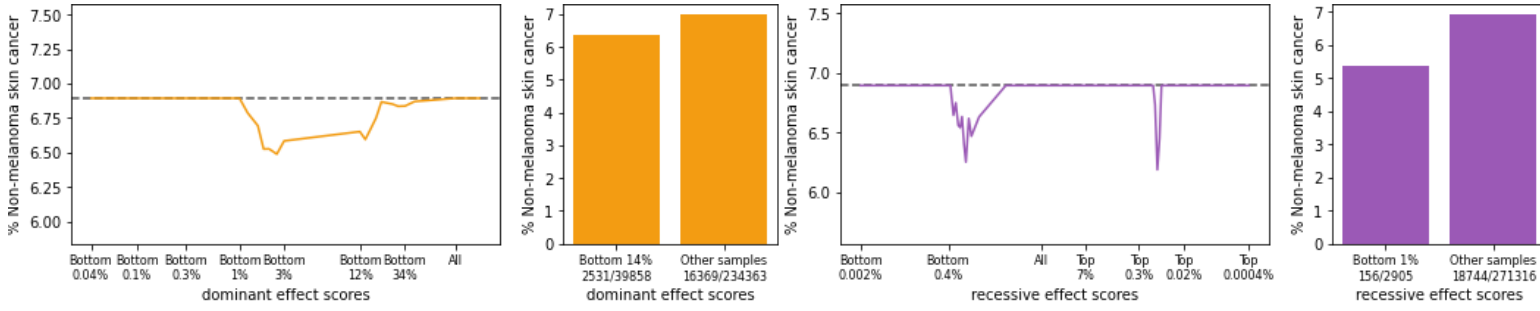

IGKV1-5 & Non-melanoma skin cancer: PWAS q-value = 0.0004 (Dominant)

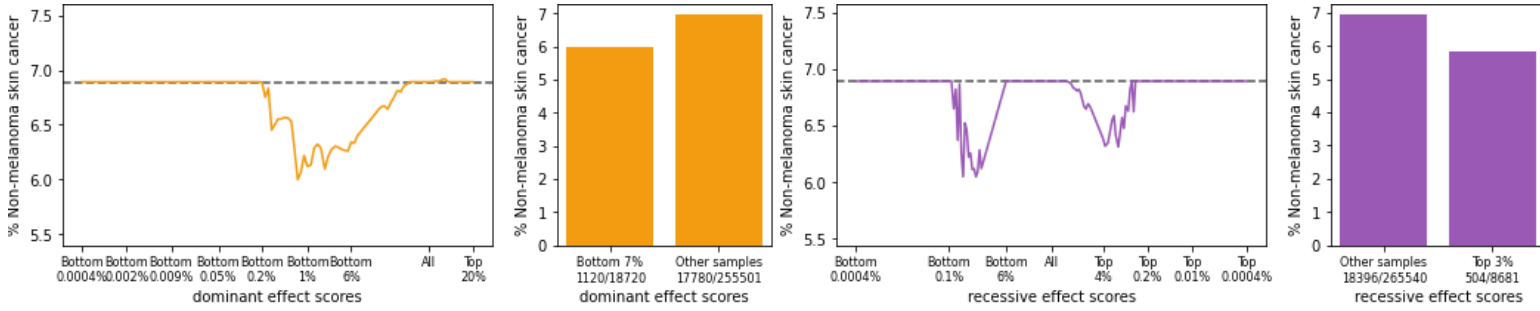

IGKV1D-16 & Non-melanoma skin cancer: PWAS q-value = 0.04 (Dominant)

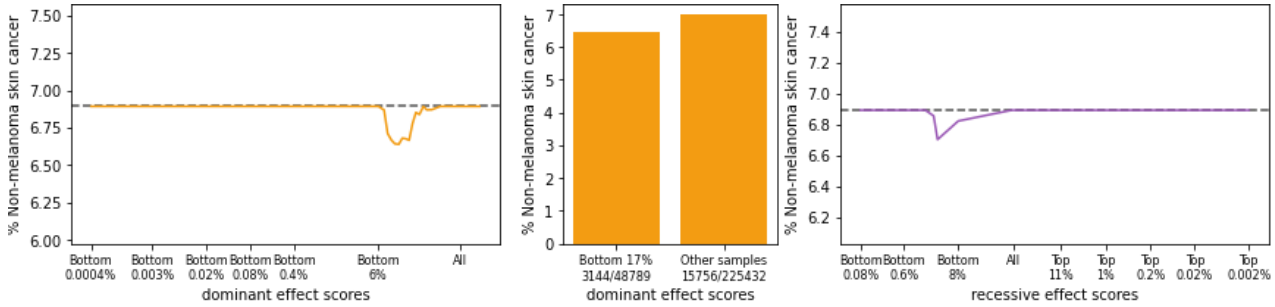

IRF3 & Non-melanoma skin cancer: PWAS q-value = 7e-06 (Dominant)

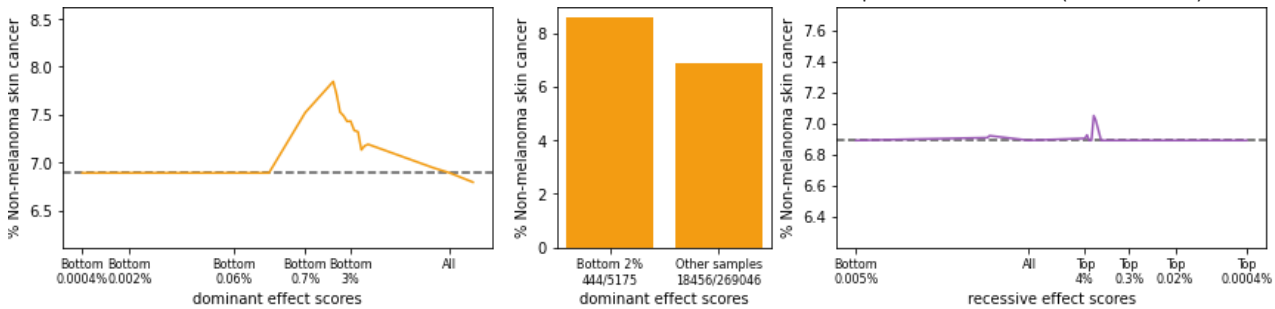

IRF7 & Non-melanoma skin cancer: PWAS q-value = 0.04 (None)

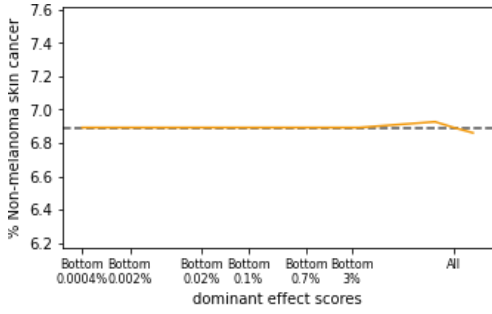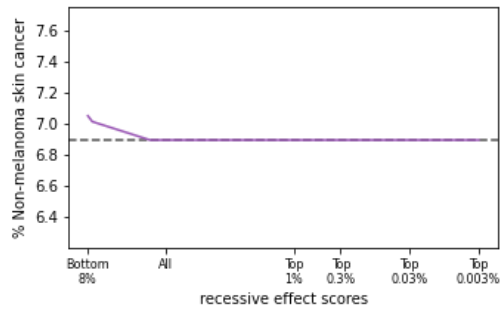

JDP2 & Non-melanoma skin cancer: PWAS q-value = 0.02 (Recessive)

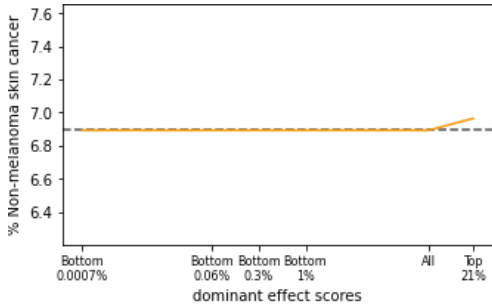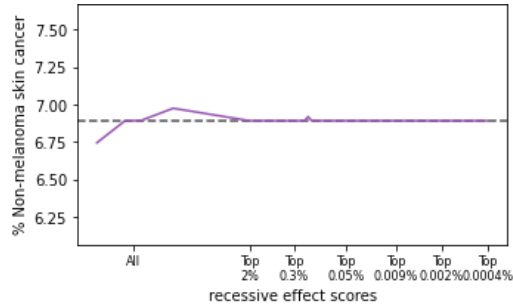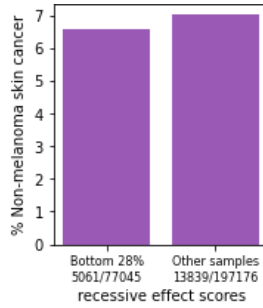

KRT5 & Non-melanoma skin cancer: PWAS q-value = 9e-06 (Dominant & recessive)

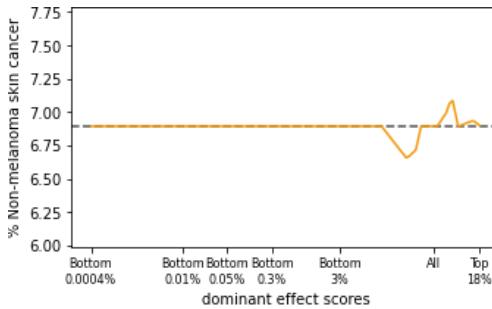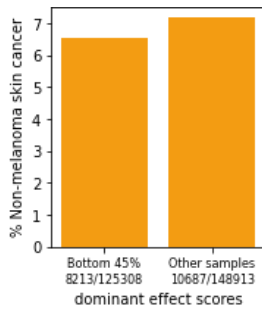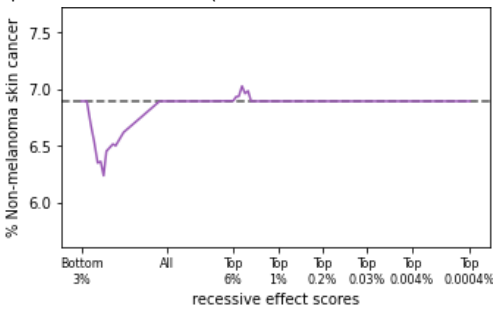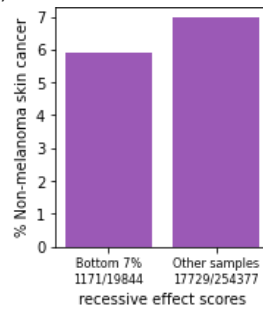

KRT75 & Non-melanoma skin cancer: PWAS q-value = 1e-08 (Dominant & recessive)

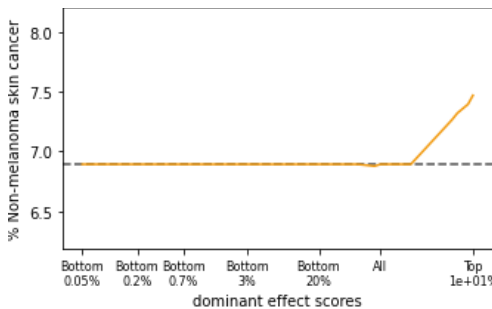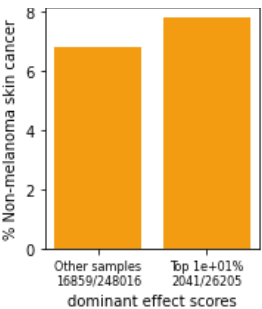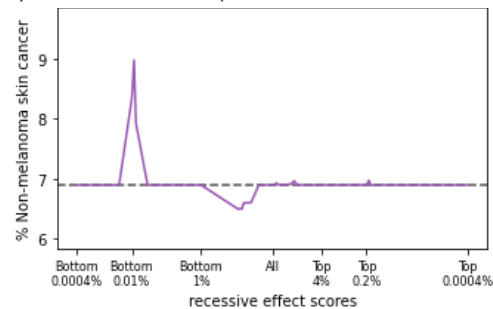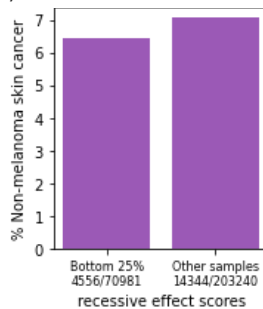

KRT82 & Non-melanoma skin cancer: PWAS q-value = 0.01 (Dominant)

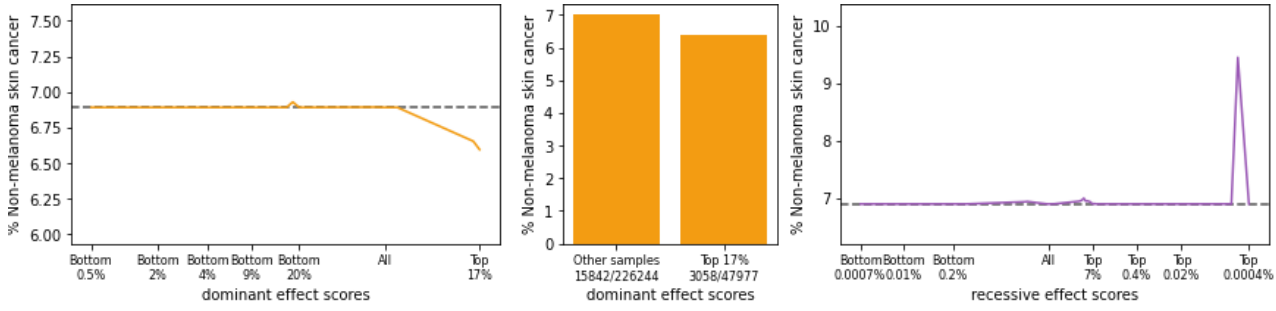

KRT84 & Non-melanoma skin cancer: PWAS q-value = 0.0003 (Recessive)

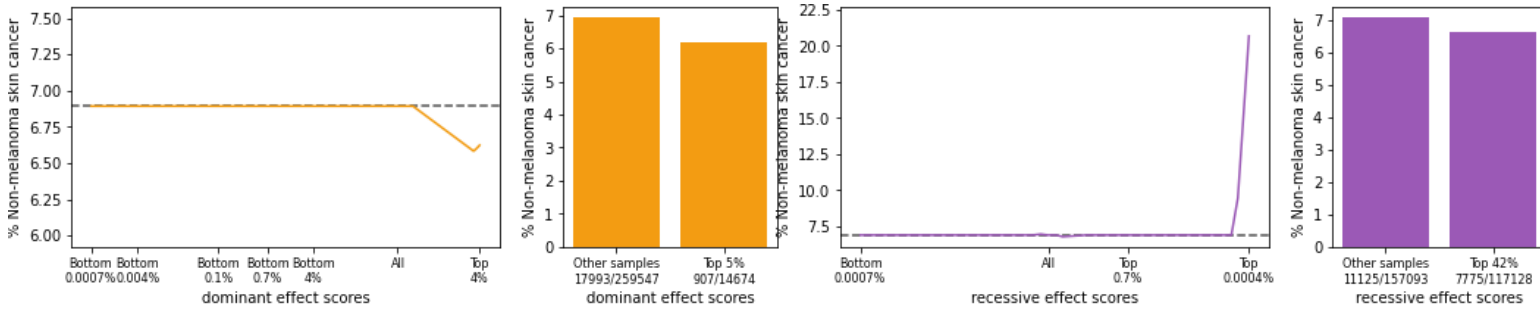

MC1R & Non-melanoma skin cancer: PWAS q-value = 1e-109 (Dominant & recessive)

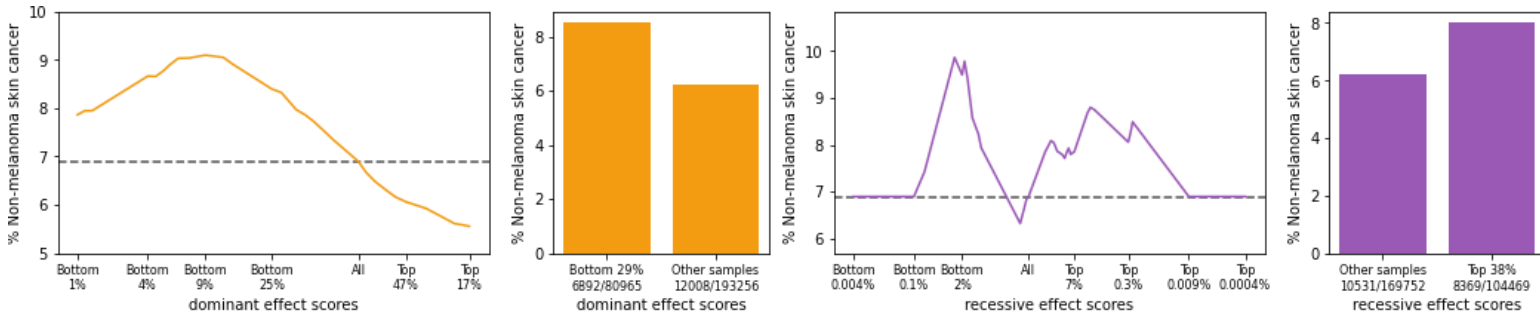

MPIG6B & Non-melanoma skin cancer: PWAS q-value = 0.002 (Dominant)

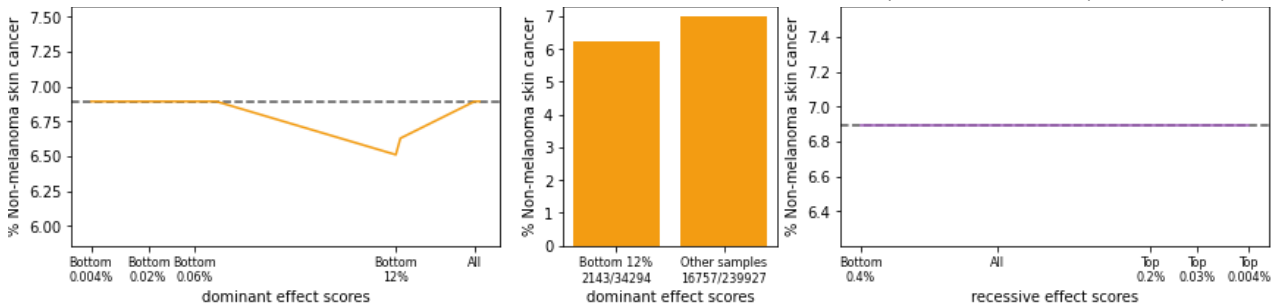

MST1R & Non-melanoma skin cancer: PWAS q-value = 0.05 (None)

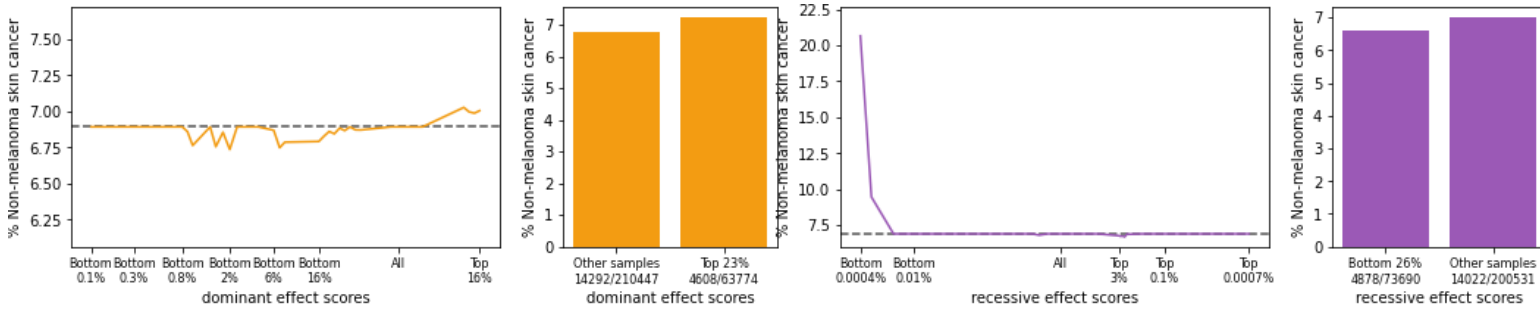

MUC22 & Non-melanoma skin cancer: PWAS q-value = 0.02 (Dominant)

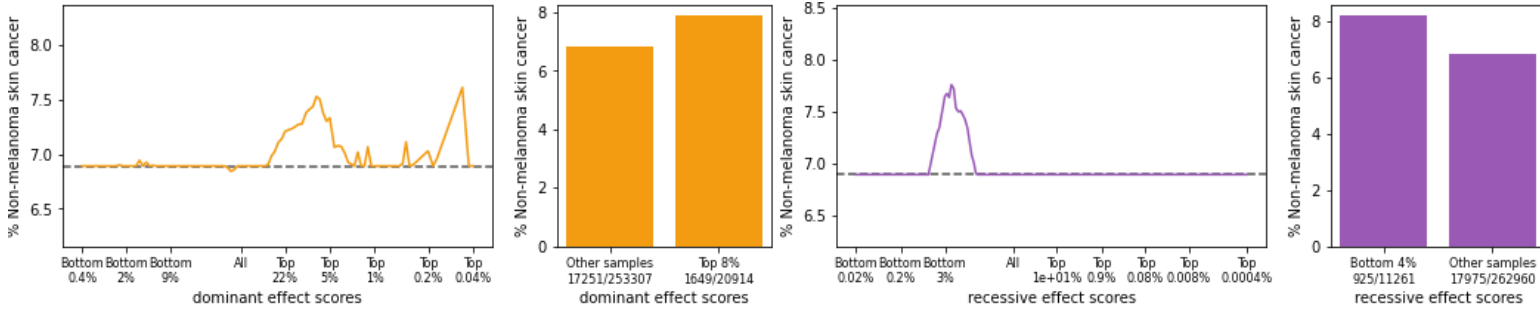

NEURL1B & Non-melanoma skin cancer: PWAS q-value = 0.03 (Dominant)

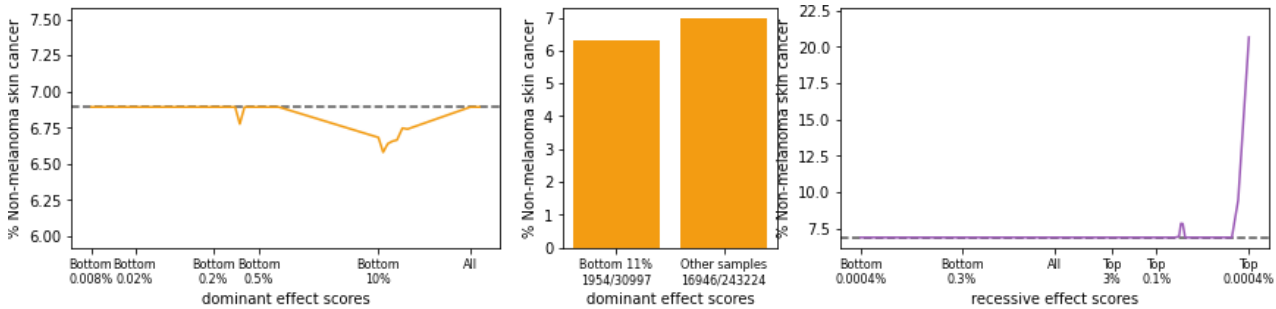

NEUROD1 & Non-melanoma skin cancer: PWAS q-value = 0.02 (None)

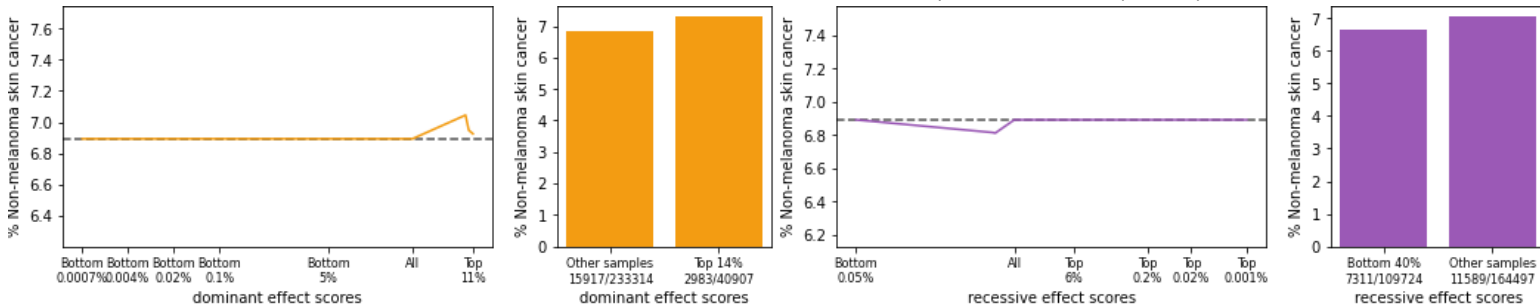

PPARGC1B & Non-melanoma skin cancer: PWAS q-value = 0.03 (None)

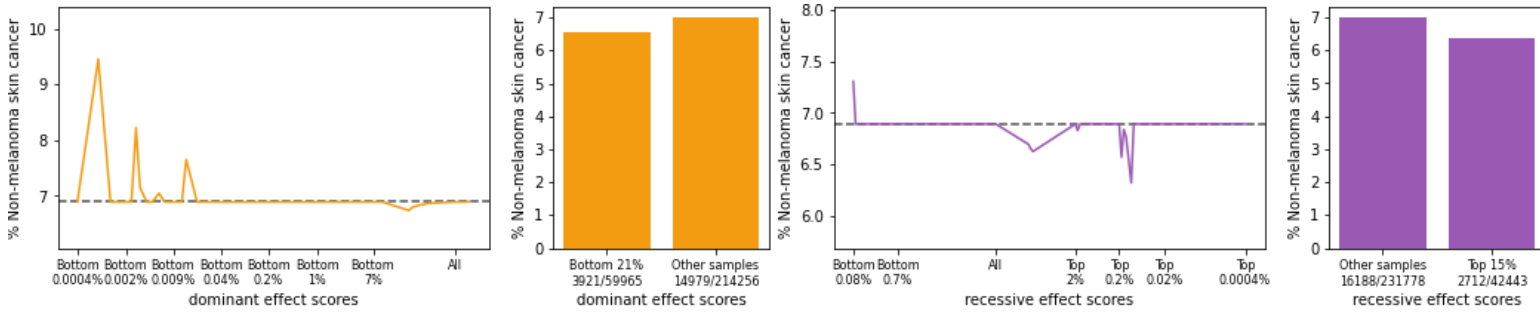

PPP1R18 & Non-melanoma skin cancer: PWAS q-value = 0.0007 (Recessive)

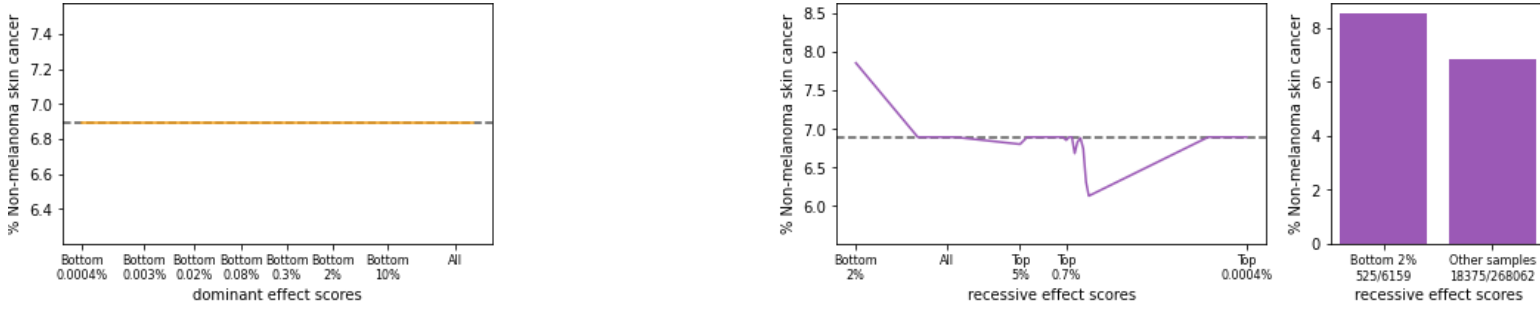

PRDM7 & Non-melanoma skin cancer: PWAS q-value = 4e-06 (Dominant)

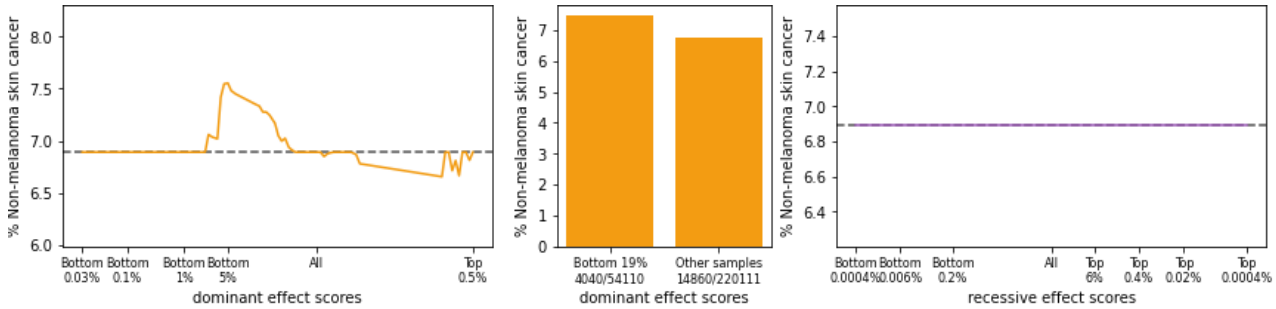

PTPN12 & Non-melanoma skin cancer: PWAS q-value = 0.02 (Recessive)

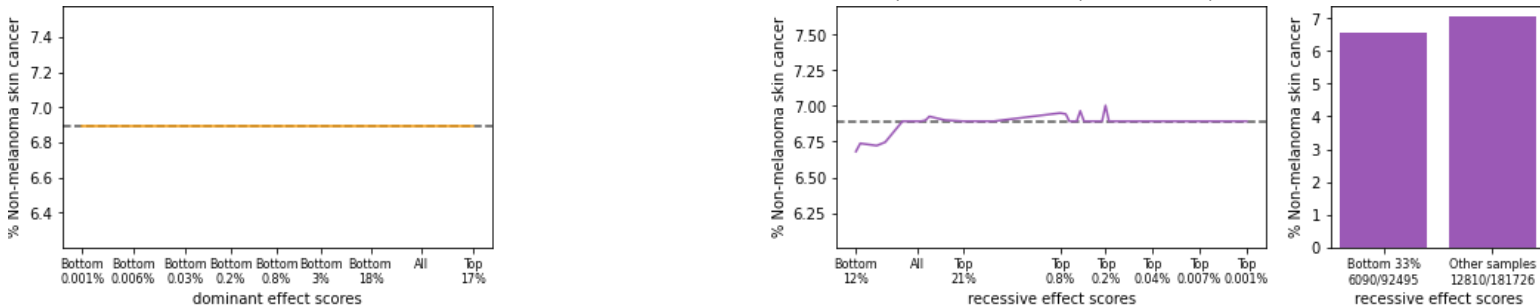

RALY & Non-melanoma skin cancer: PWAS q-value = 0.005 (Dominant)

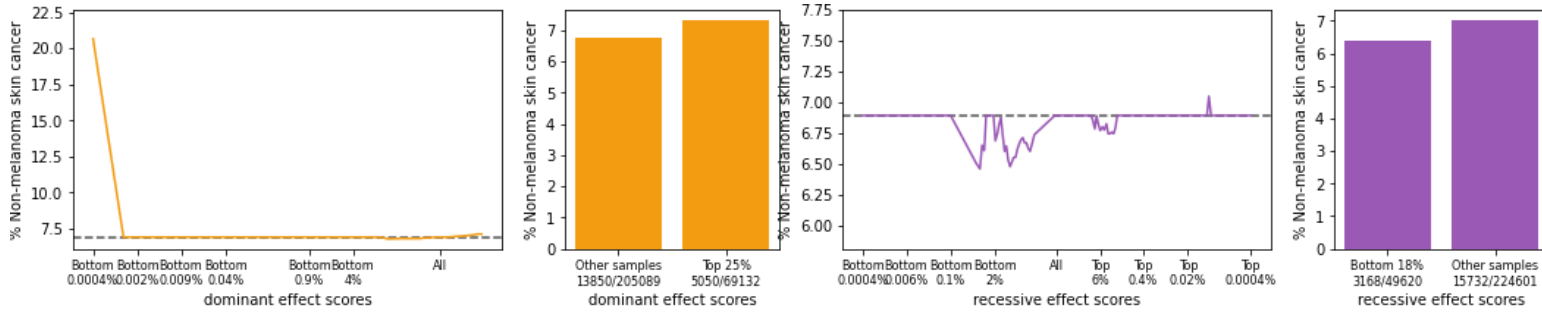

RBM17 & Non-melanoma skin cancer: PWAS q-value = 0.02 (None)

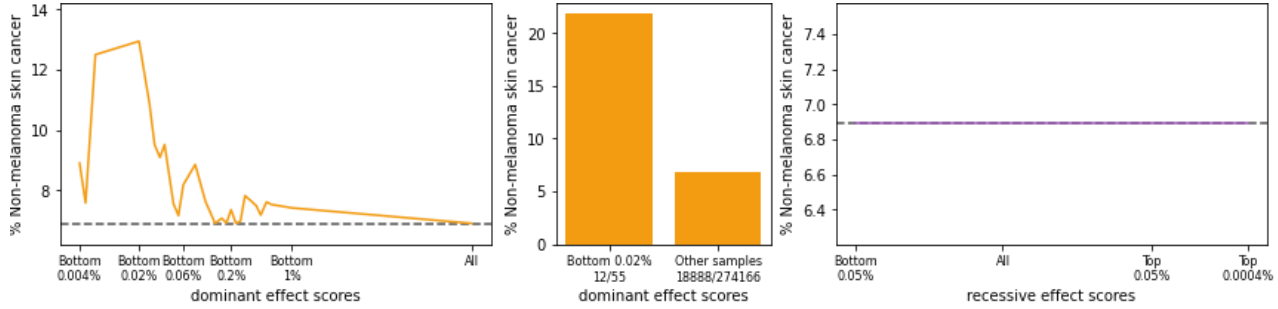

RPL13 & Non-melanoma skin cancer: PWAS q-value = 0.0004 (Dominant)

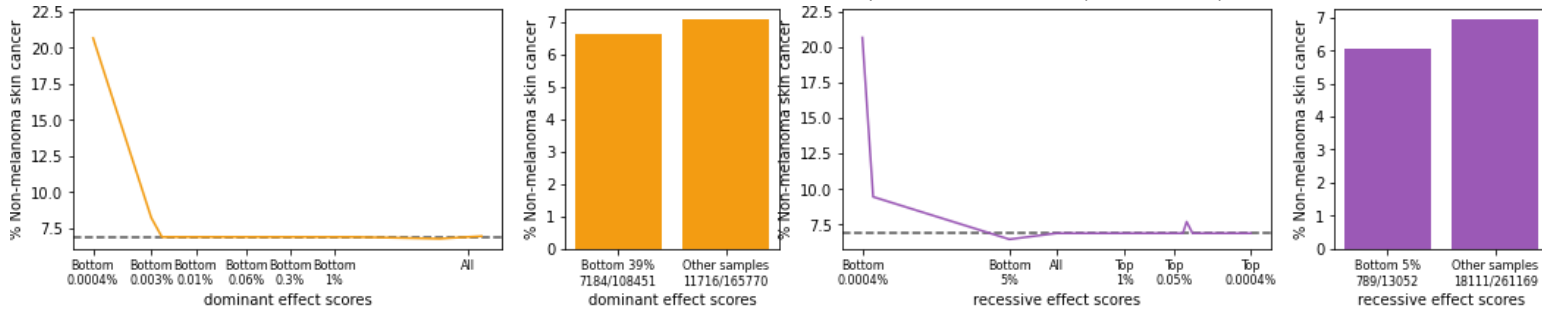

RPRD2 & Non-melanoma skin cancer: PWAS q-value = 0.008 (Recessive)

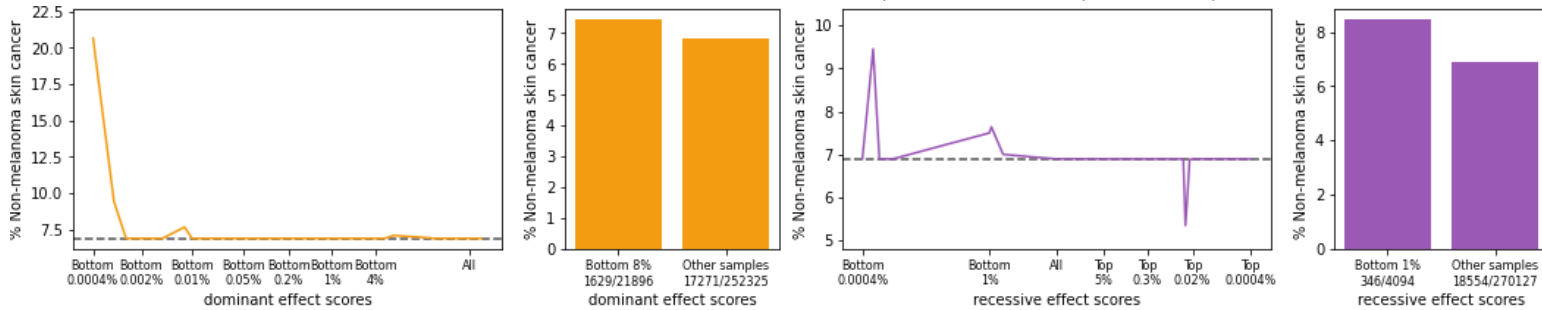



RPS6KA4 & Non-melanoma skin cancer: PWAS q-value = 0.01 (None)

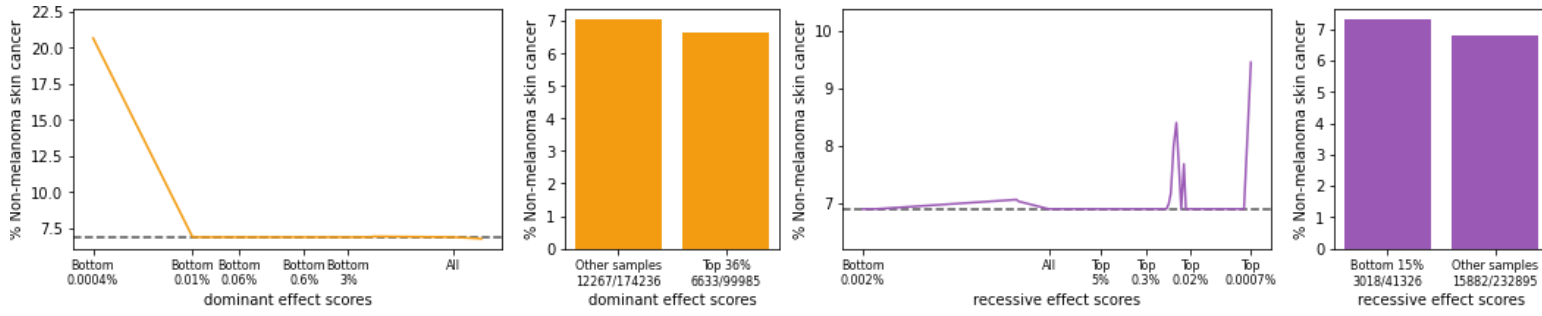

RSC1A1 & Non-melanoma skin cancer: PWAS q-value = 0.04 (None)

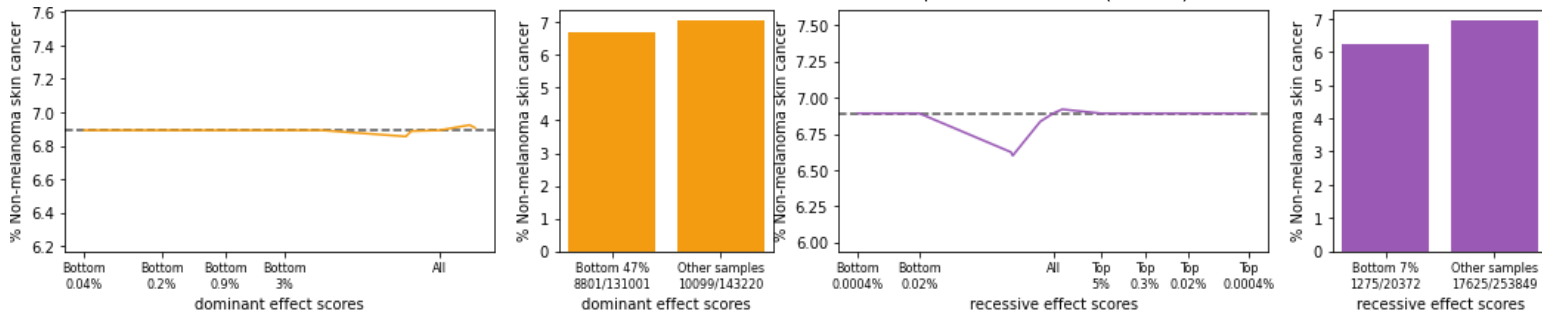

SEMA3F & Non-melanoma skin cancer: PWAS q-value = 0.008 (Recessive)

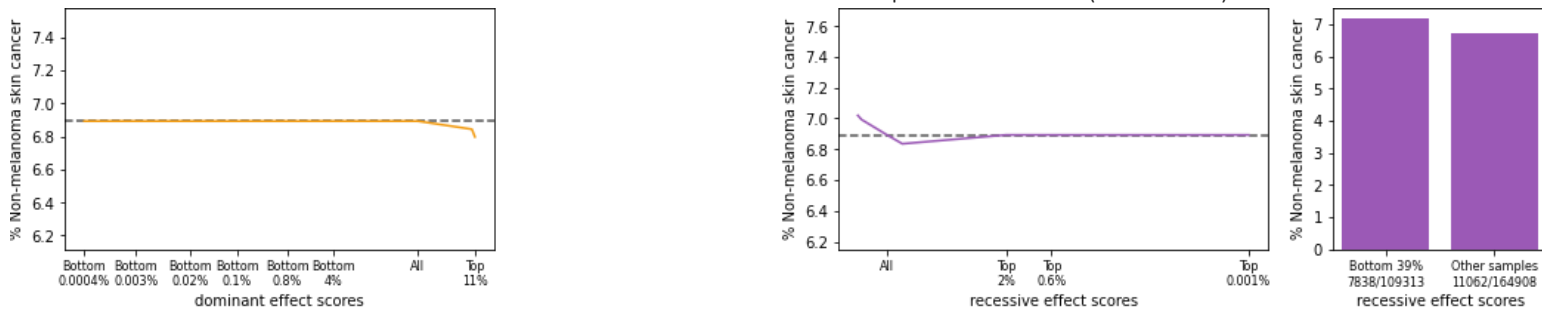

SLC45A2 & Non-melanoma skin cancer: PWAS q-value = 1e-20 (Recessive)

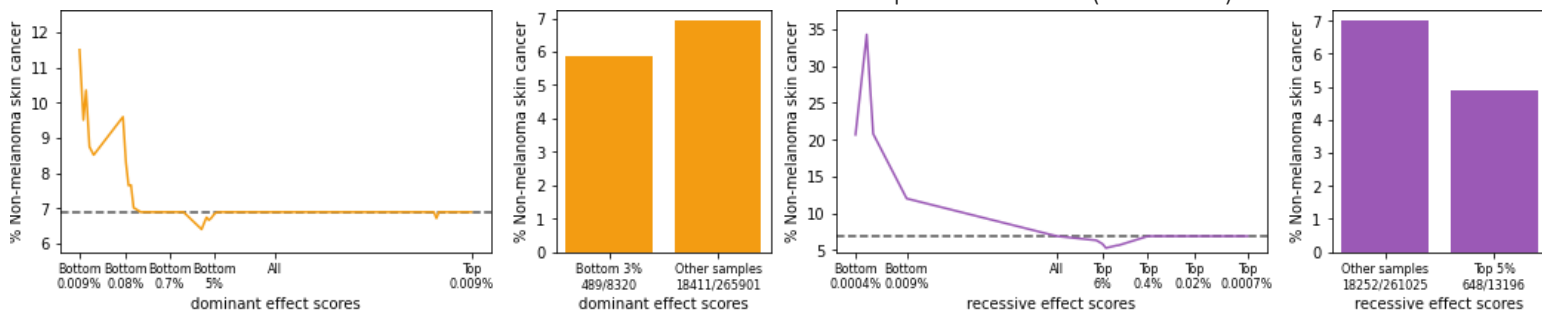

SPATA33 & Non-melanoma skin cancer: PWAS q-value = 0.003 (Dominant)

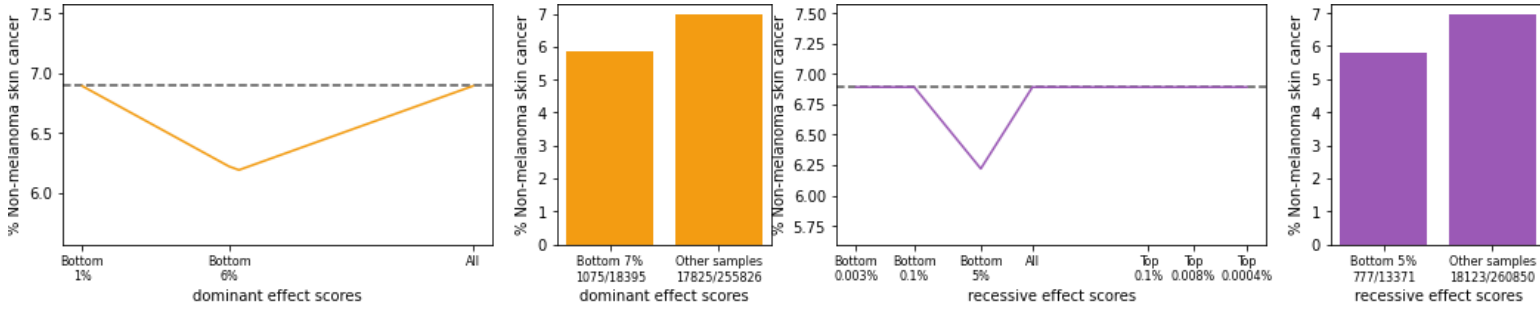

TRAK2 & Non-melanoma skin cancer: PWAS q-value = 6e-08 (Recessive)

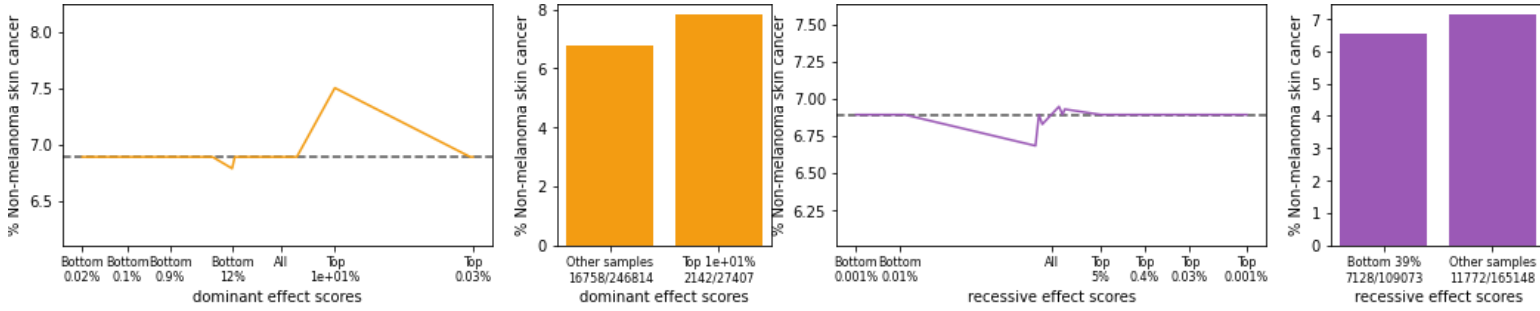

TRIM77 & Non-melanoma skin cancer: PWAS q-value = 7e-05 (Dominant & recessive)

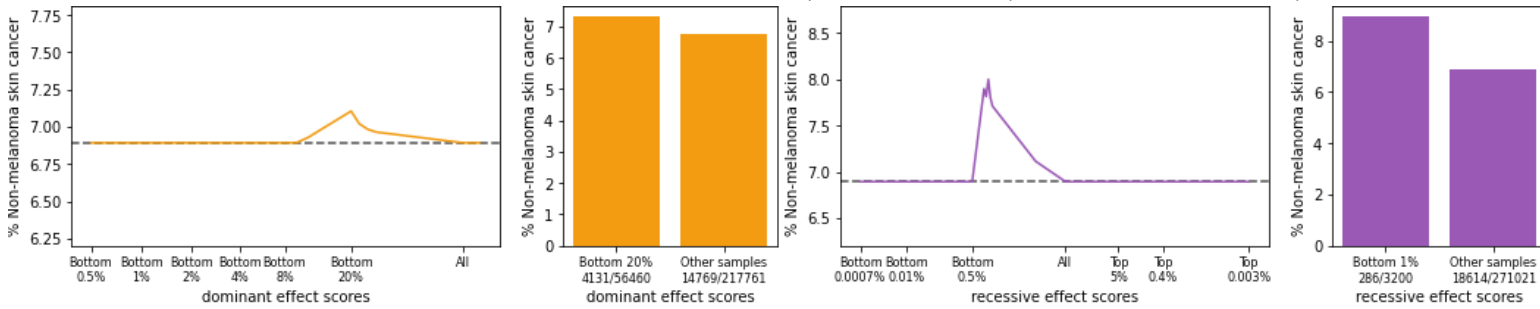

TYR & Non-melanoma skin cancer: PWAS q-value = 6e-13 (Dominant & recessive)

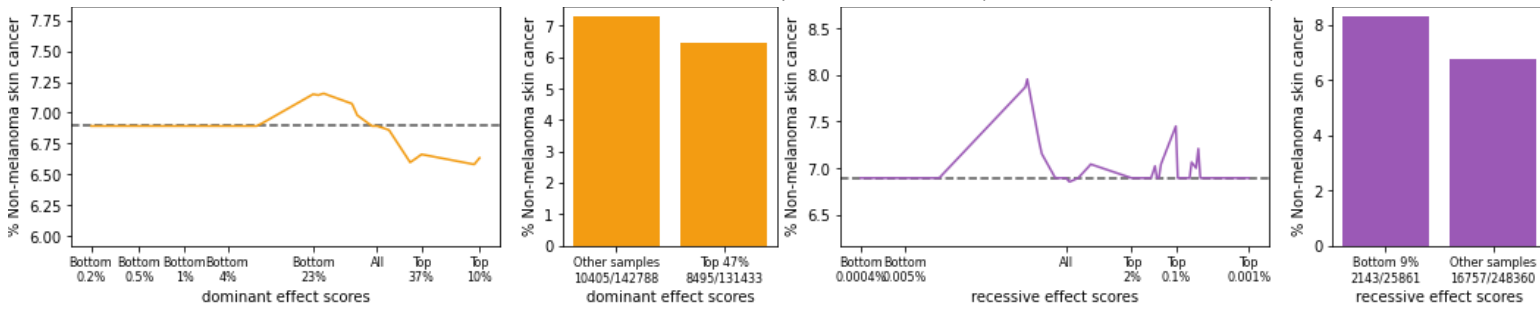

XPC & Non-melanoma skin cancer: PWAS q-value = 0.04 (Recessive)

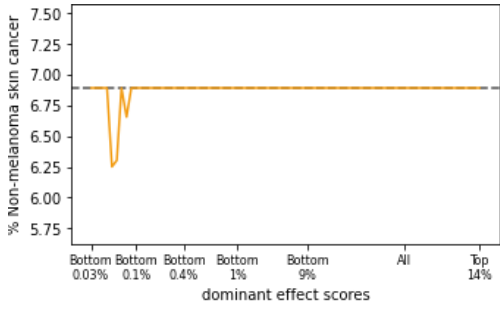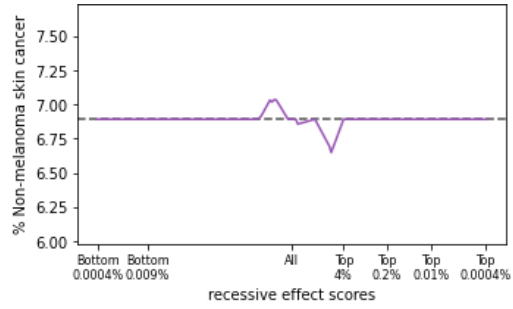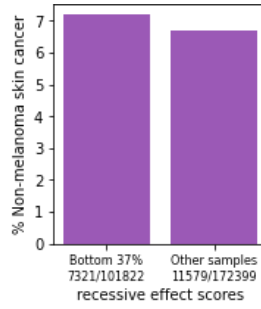

ZNF276 & Non-melanoma skin cancer: PWAS q-value = 0.0001 (Dominant & recessive)

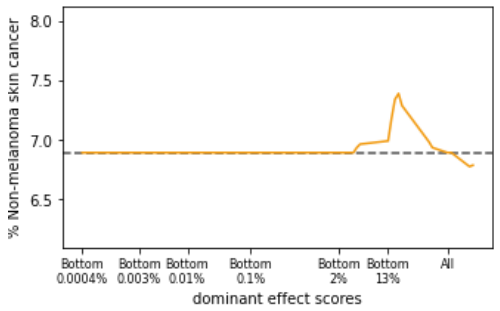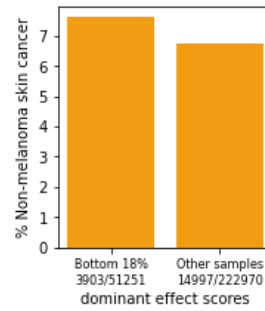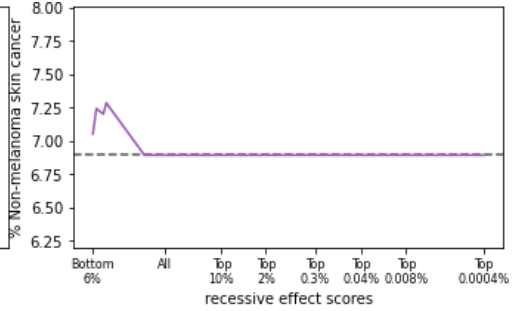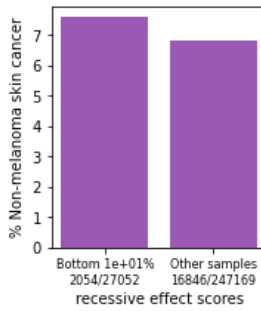

ZNF865 & Non-melanoma skin cancer: PWAS q-value = 0.04 (Dominant)

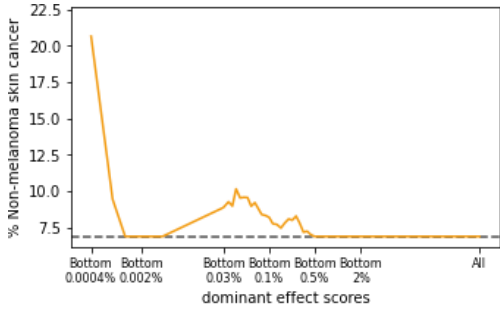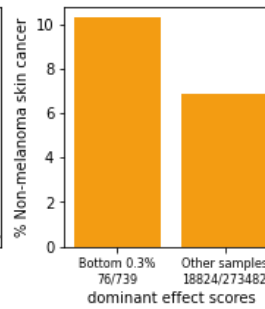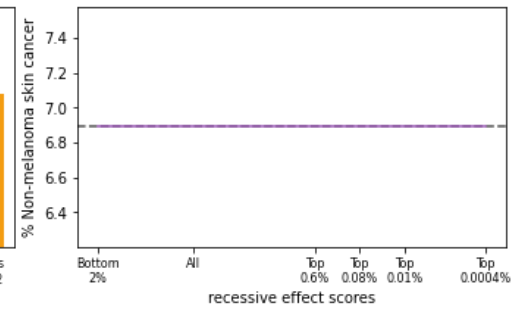

ALS2CR12 & Pan-cancer: PWAS q-value = 5e-09 (Dominant & recessive)

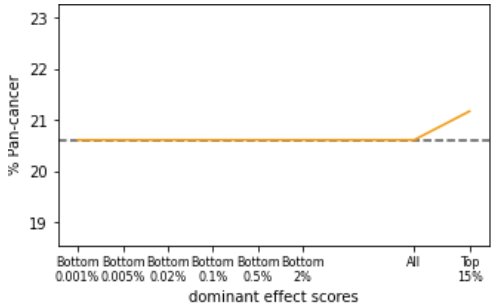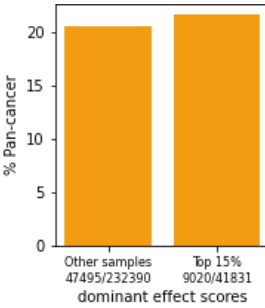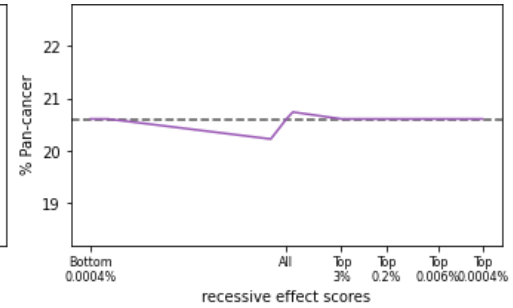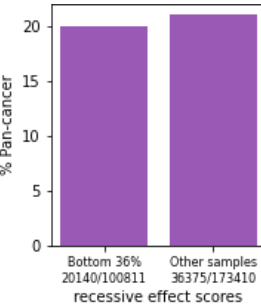

BNIPL & Pan-cancer: PWAS q-value = 0.01 (Dominant)

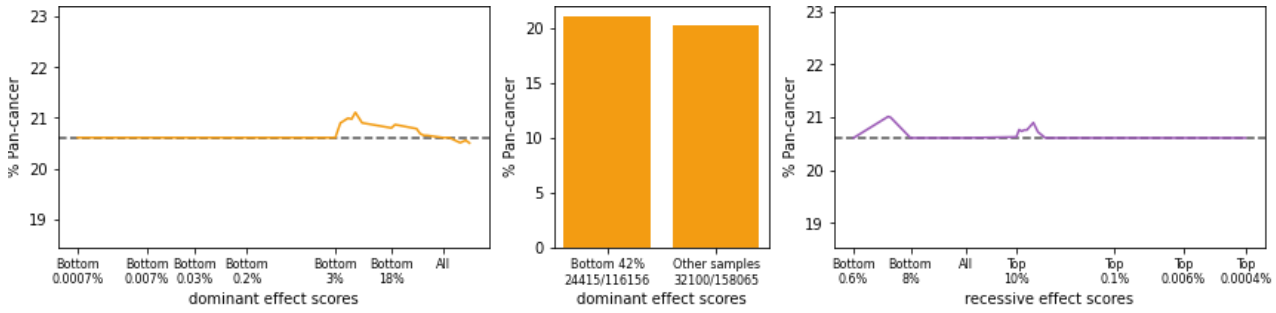

C1orf52 & Pan-cancer: PWAS q-value = 0.04 (Dominant)

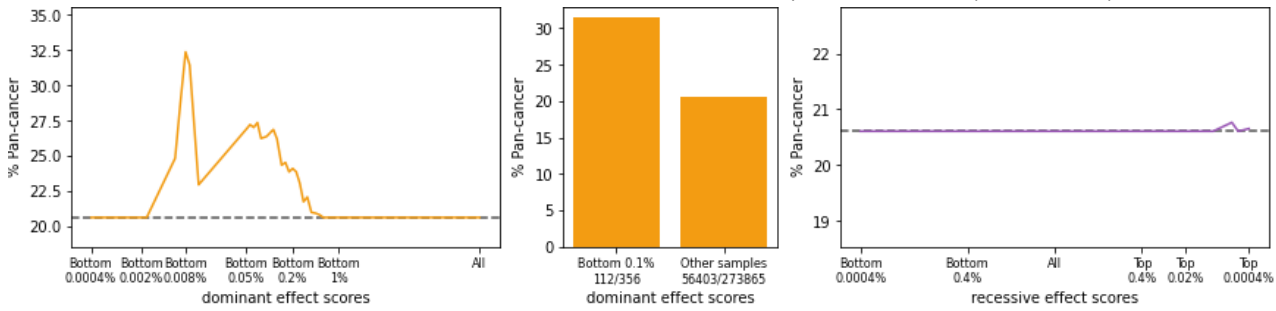

CERS2 & Pan-cancer: PWAS q-value = 0.006 (Dominant)

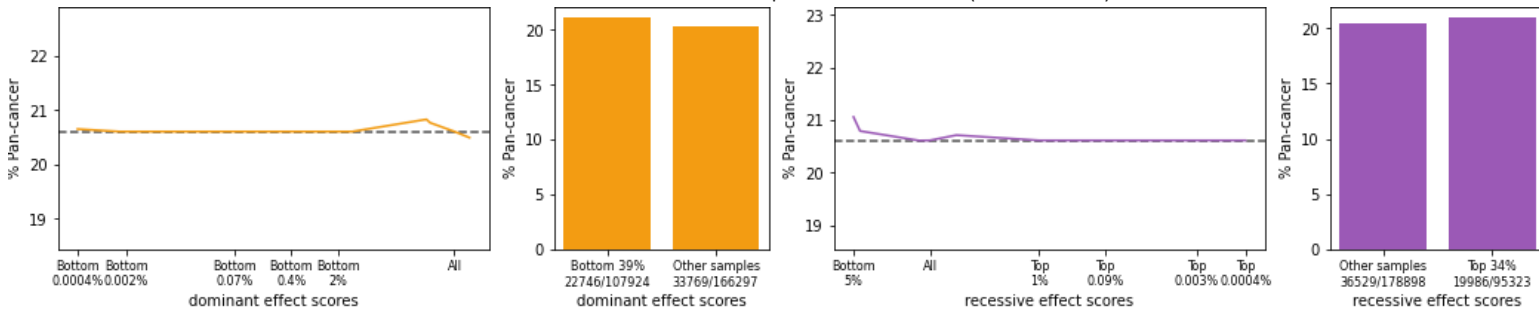

CHEK2 & Pan-cancer: PWAS q-value = 0.007 (Dominant)

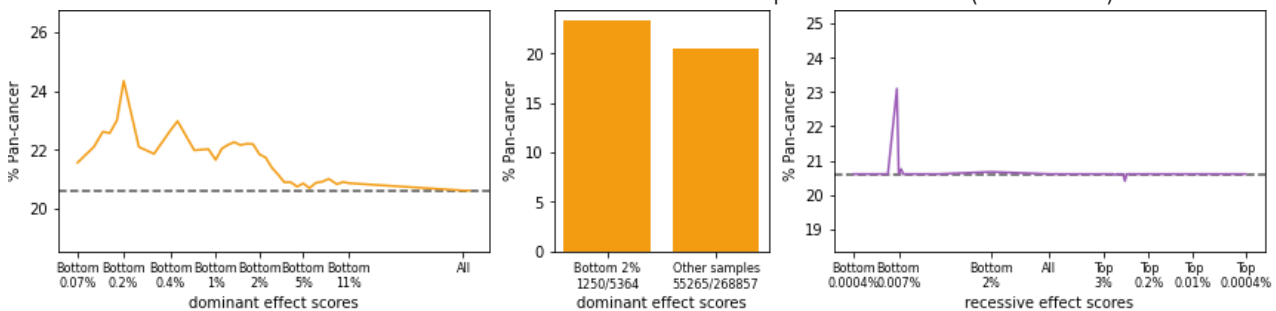

CRYAA & Pan-cancer: PWAS q-value = 0.02 (Dominant)

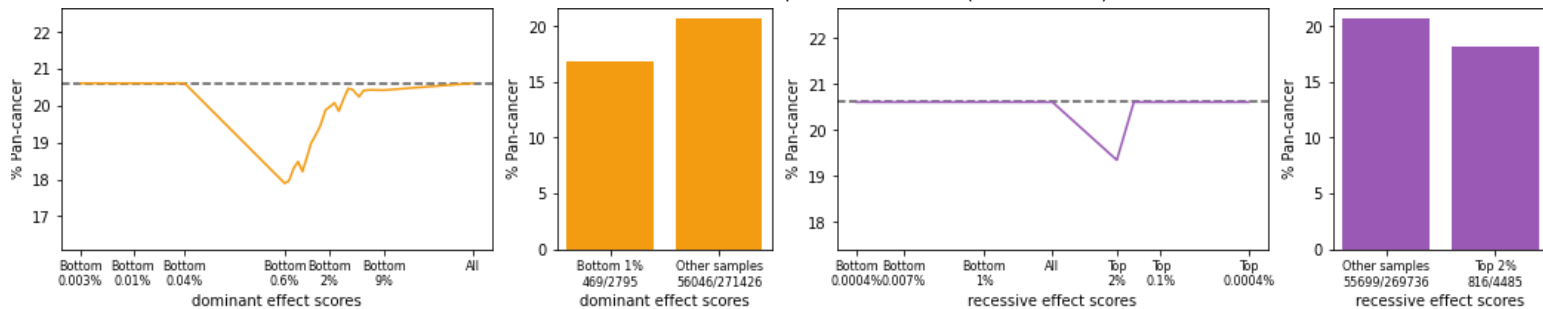

HLA-DPA1 & Pan-cancer: PWAS q-value = 0.01 (None)

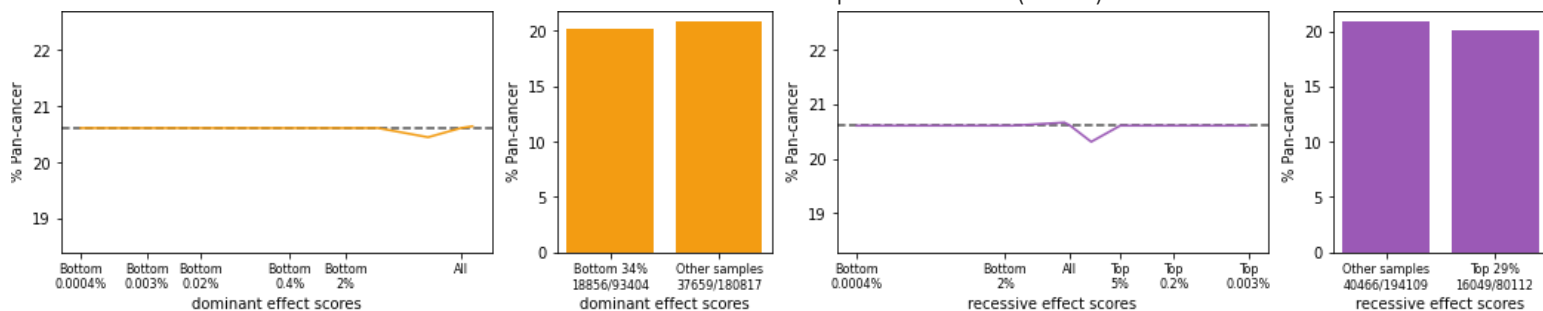

HOXB13 & Pan-cancer: PWAS q-value = 0.01 (Dominant)

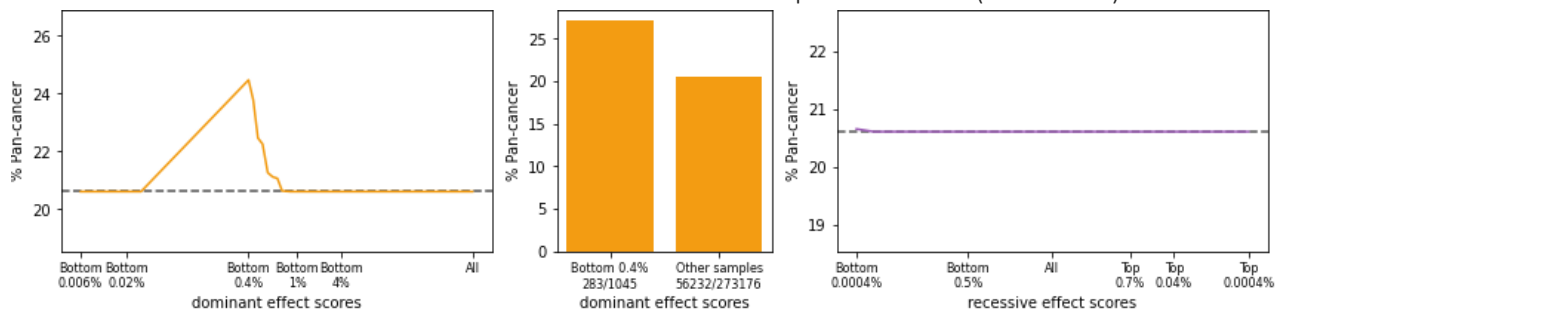

MC1R & Pan-cancer: PWAS q-value = 6e-34 (Dominant & recessive)

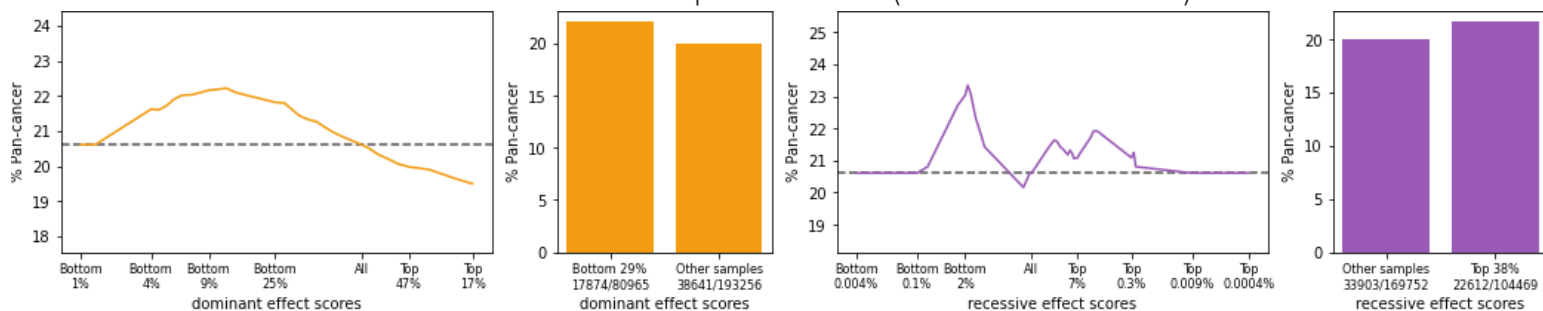

SH2B3 & Pan-cancer: PWAS q-value = 0.02 (None)

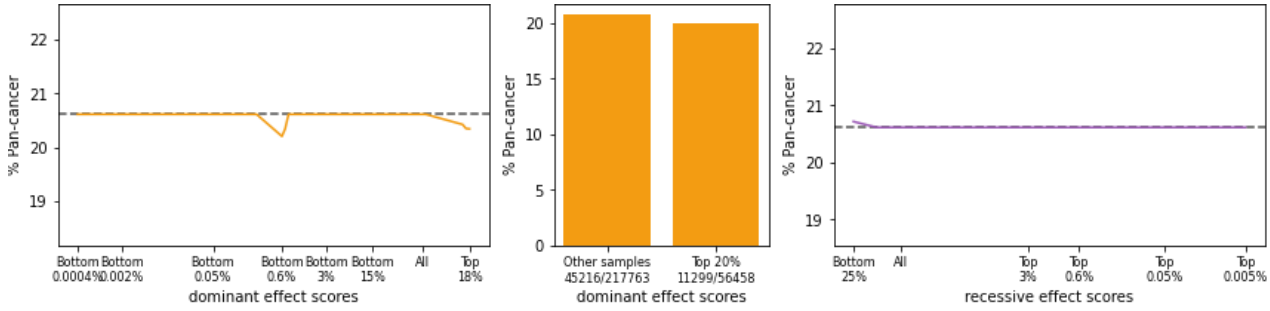

SLC45A2 & Pan-cancer: PWAS q-value = 0.02 (Recessive)

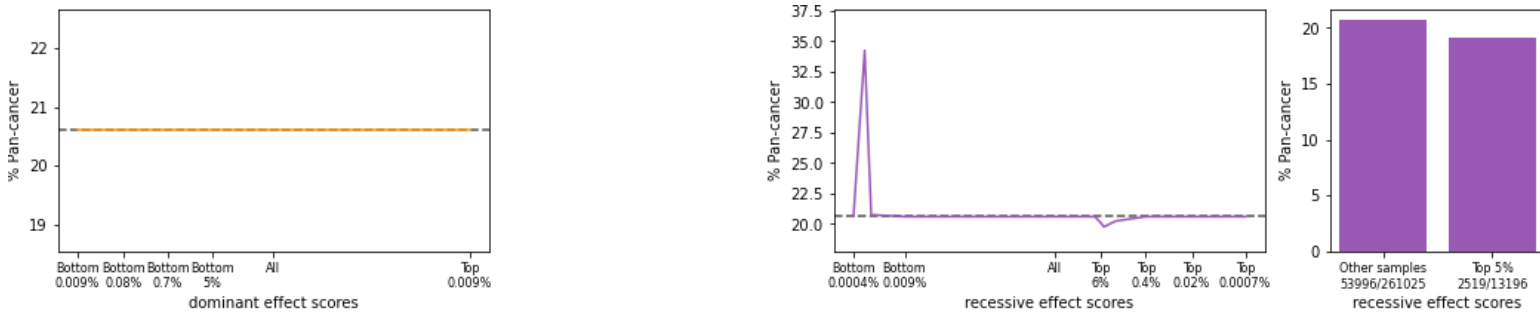

STN1 & Pan-cancer: PWAS q-value = 9e-06 (Recessive)

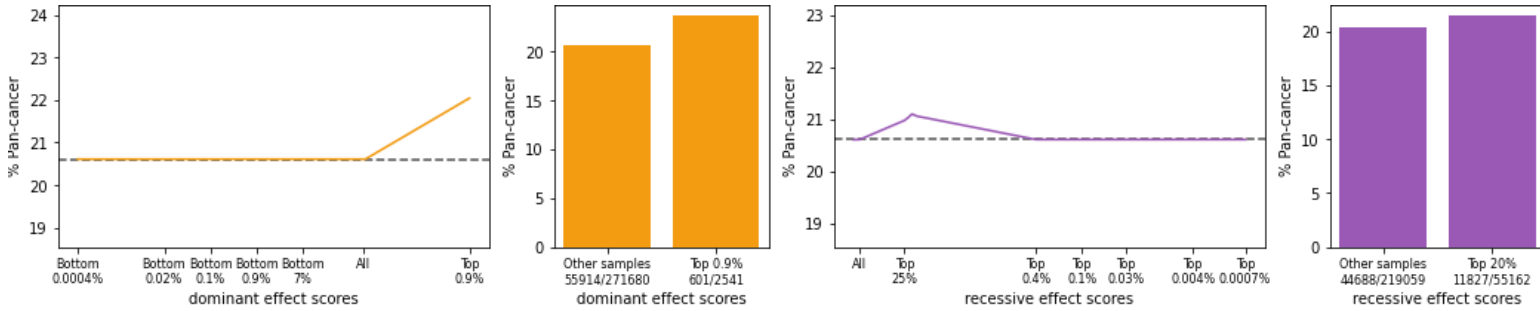

TYR & Pan-cancer: PWAS q-value = 1e-06 (Dominant & recessive)

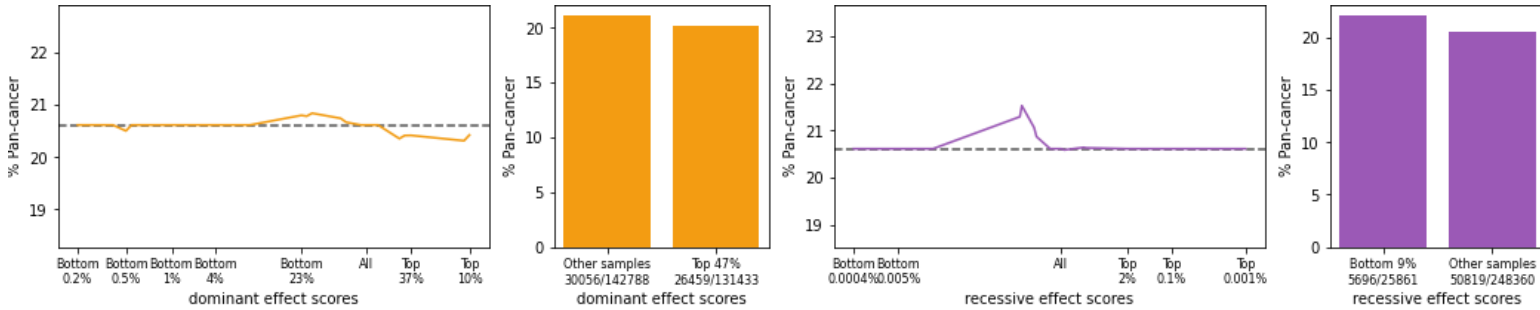

OR6K6 & Pancreatic cancer: PWAS q-value = 0.02 (Recessive)

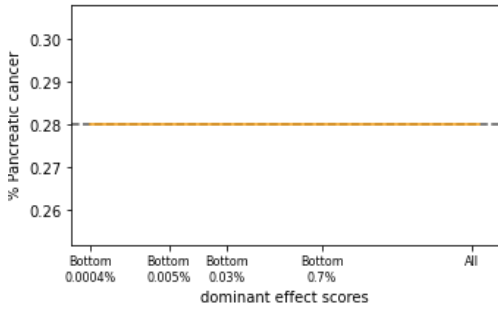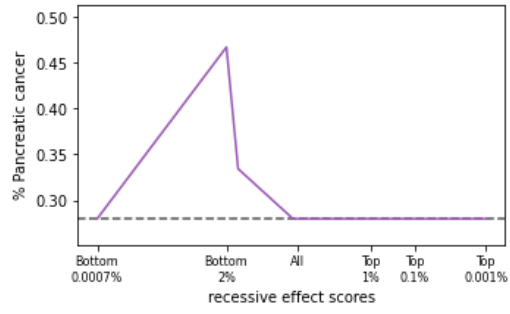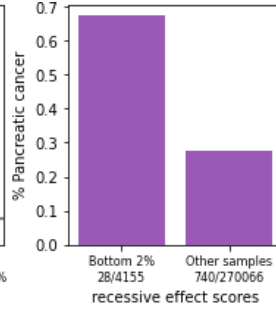

UBE3A & Pancreatic cancer: PWAS q-value = 0.0008 (Recessive)

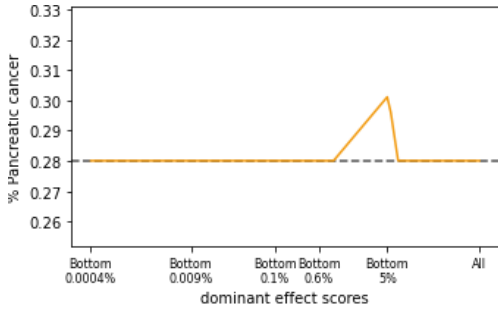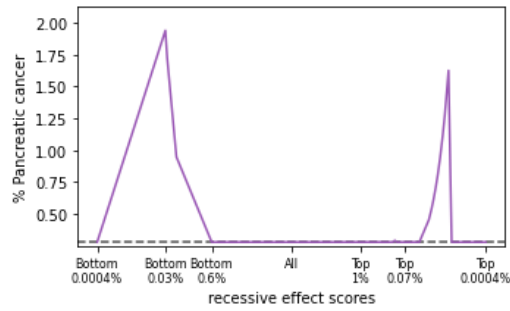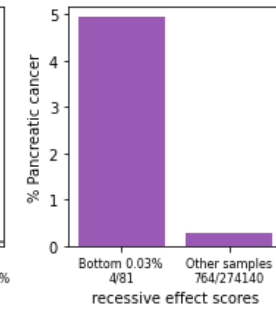

C6orf15 & Prostate cancer: PWAS q-value = 0.03 (None)

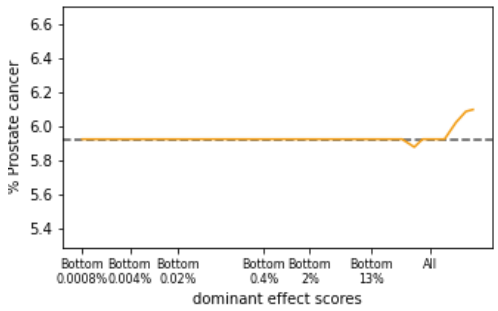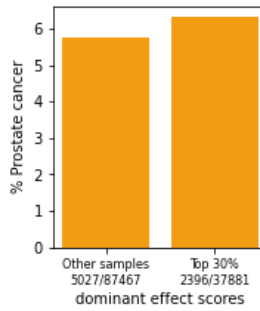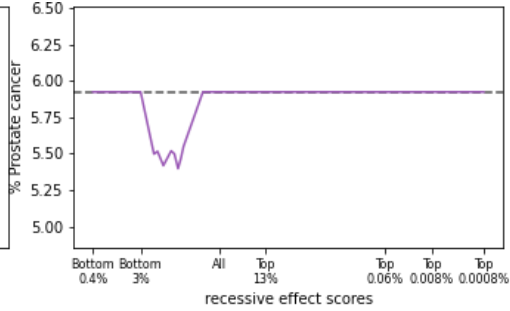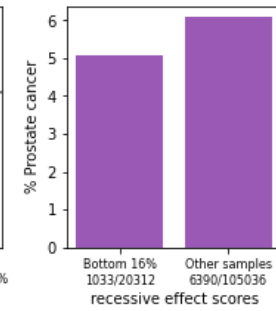

CHEK2 & Prostate cancer: PWAS q-value = 0.03 (Dominant)

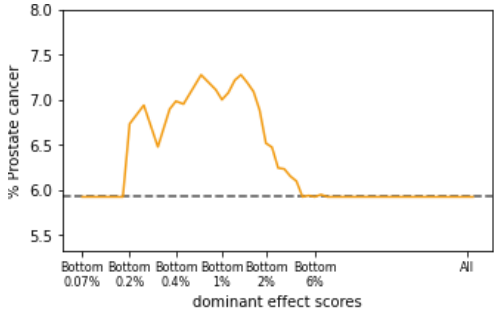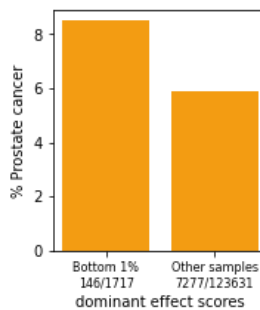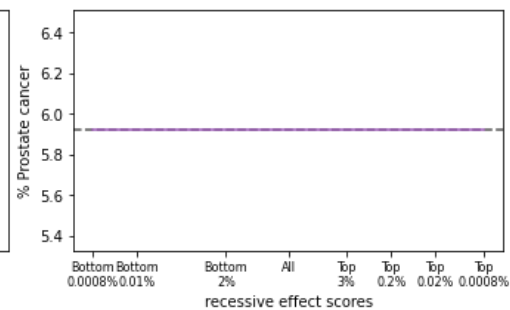

GGCX & Prostate cancer: PWAS q-value = 0.02 (Dominant)

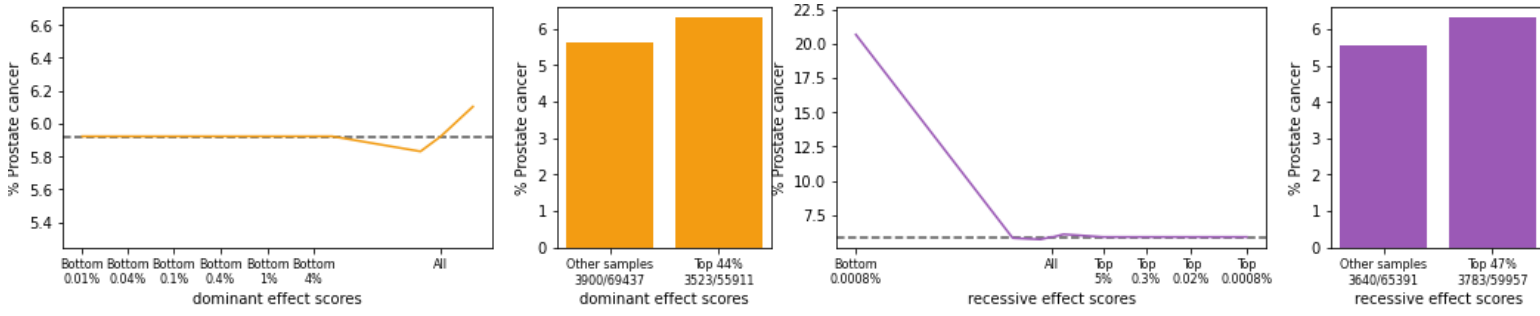

HOXB13 & Prostate cancer: PWAS q-value = 2e-31 (Dominant)

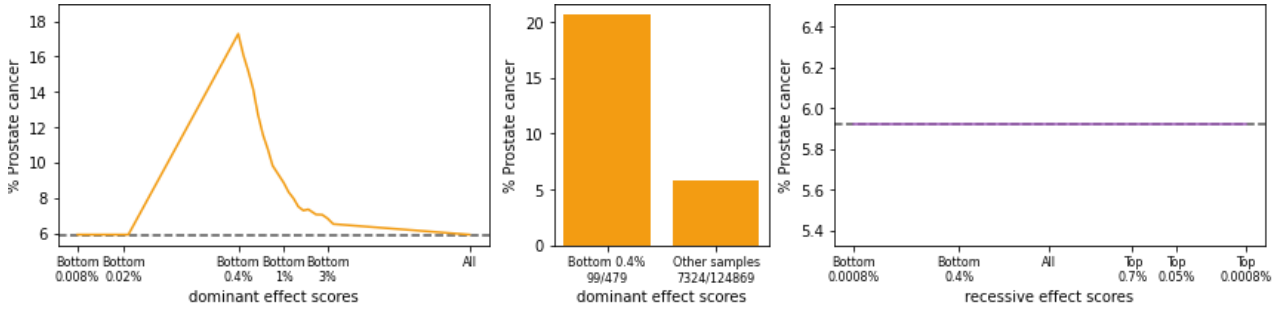

KLK3 & Prostate cancer: PWAS q-value = 4e-09 (Dominant)

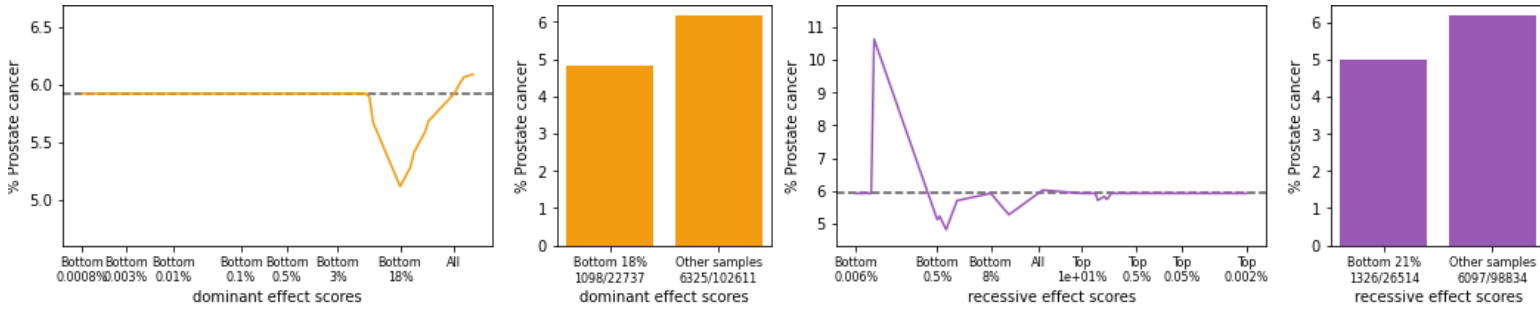

LMTK2 & Prostate cancer: PWAS q-value = 0.02 (Recessive)

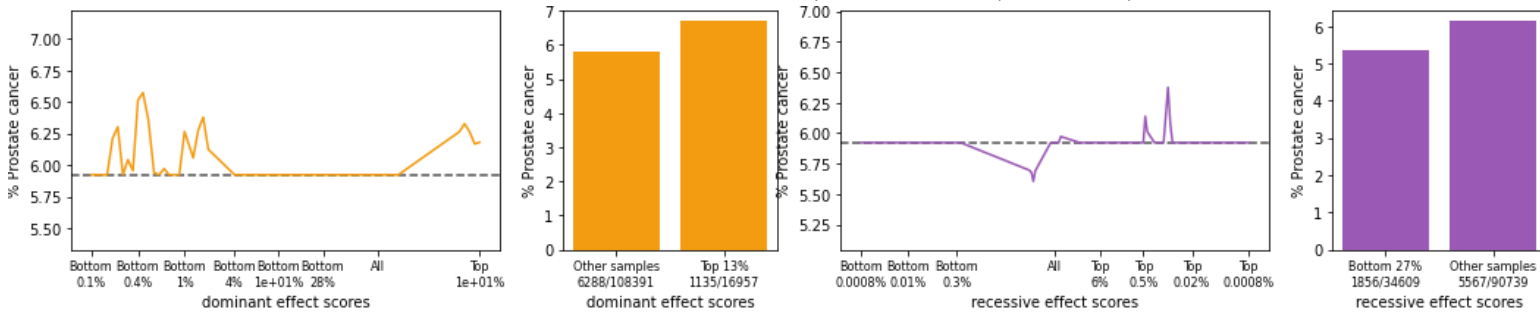



POU5F1B & Prostate cancer: PWAS q-value =  $1e-22$  (Dominant & recessive)

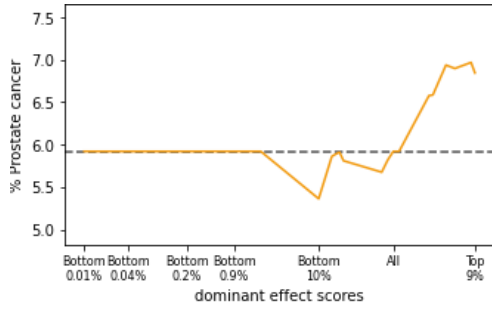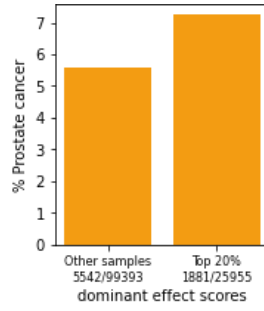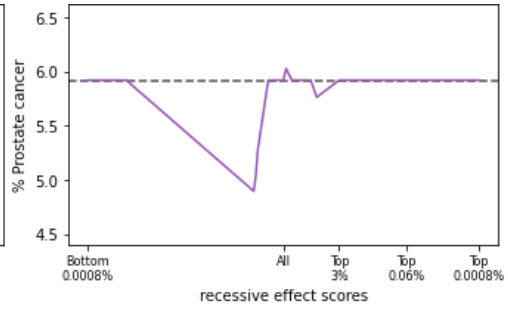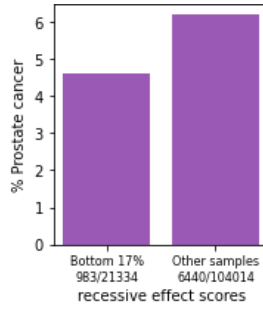

SLC2A4RG & Prostate cancer: PWAS q-value = 0.02 (Recessive)

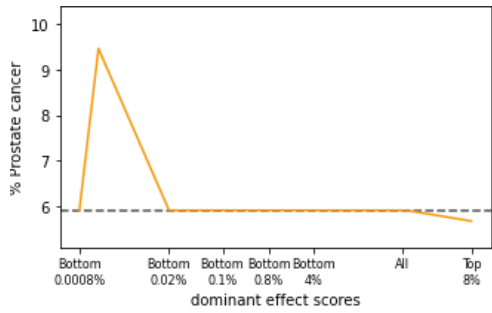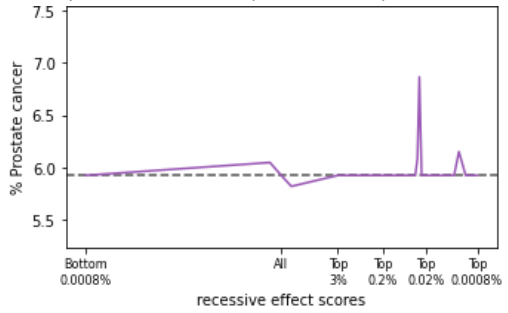

Supplement: 41598_2021_94252_MOESM1_ESM.pdf [file 41598_2021_94252_MOESM1_ESM.pdf]
